# Supplementary material for: Mechano-regulation of GLP-1 production by Piezo1 in intestinal L cells
Source: eLife journal article supplement (doi:10.7554/elife.97854), 2024-06-19
Supplement: fig1-data1 [file elife-97854-fig1-data1-v1.zip]

Figure 1B

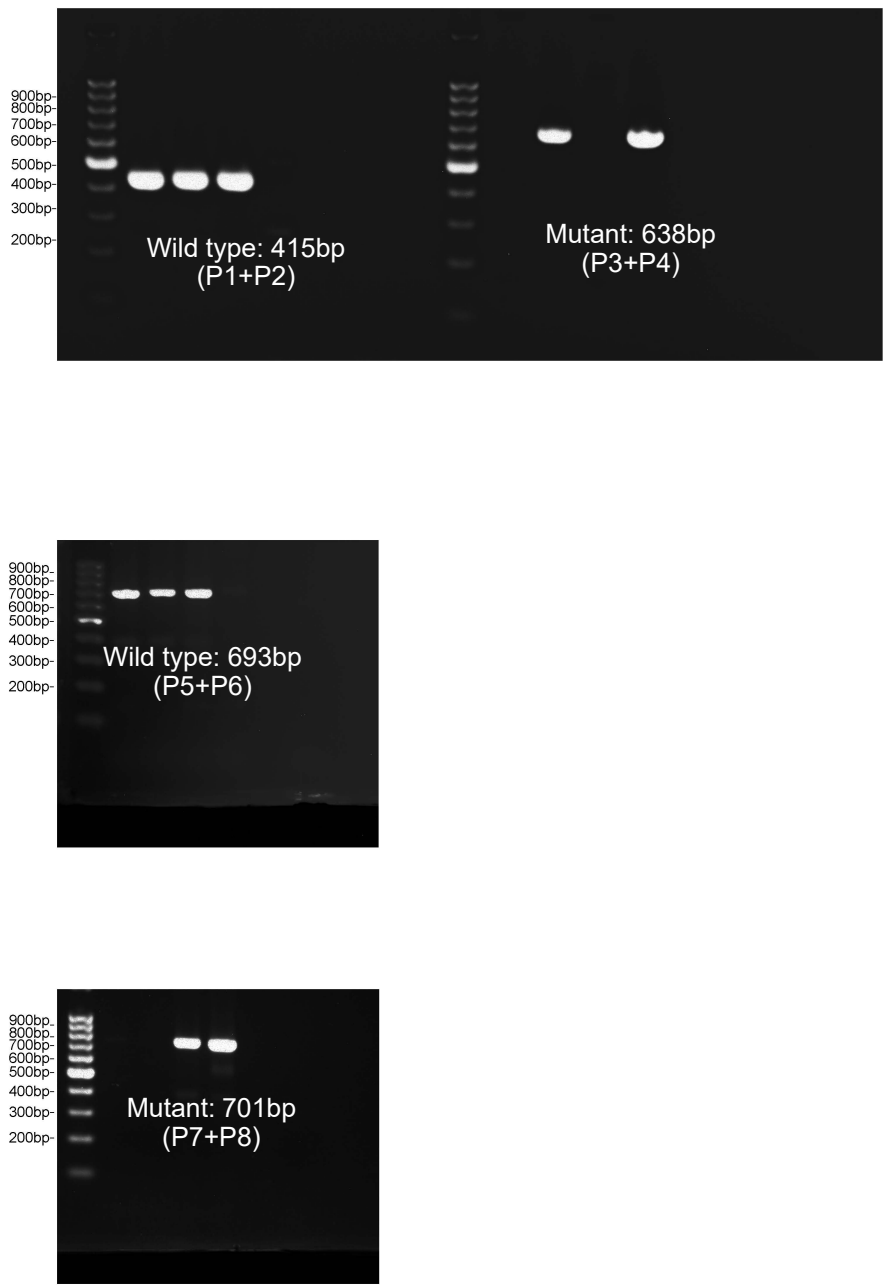

Figure 1C

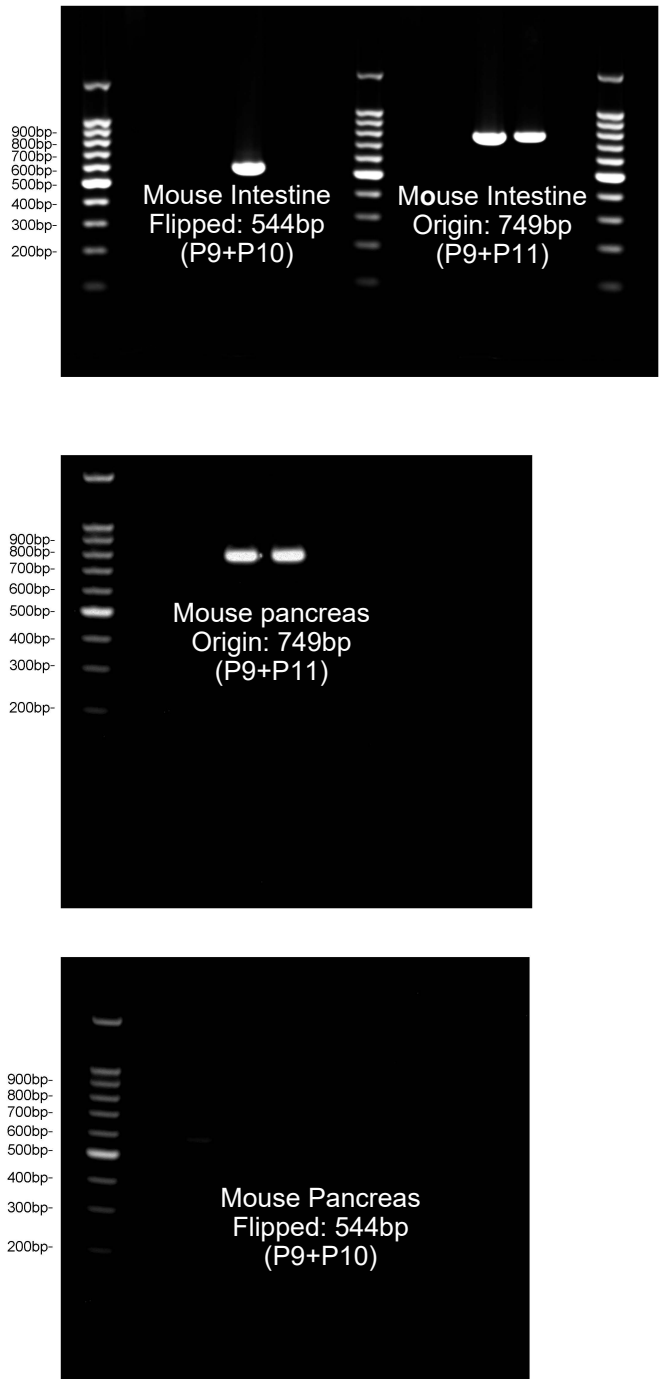

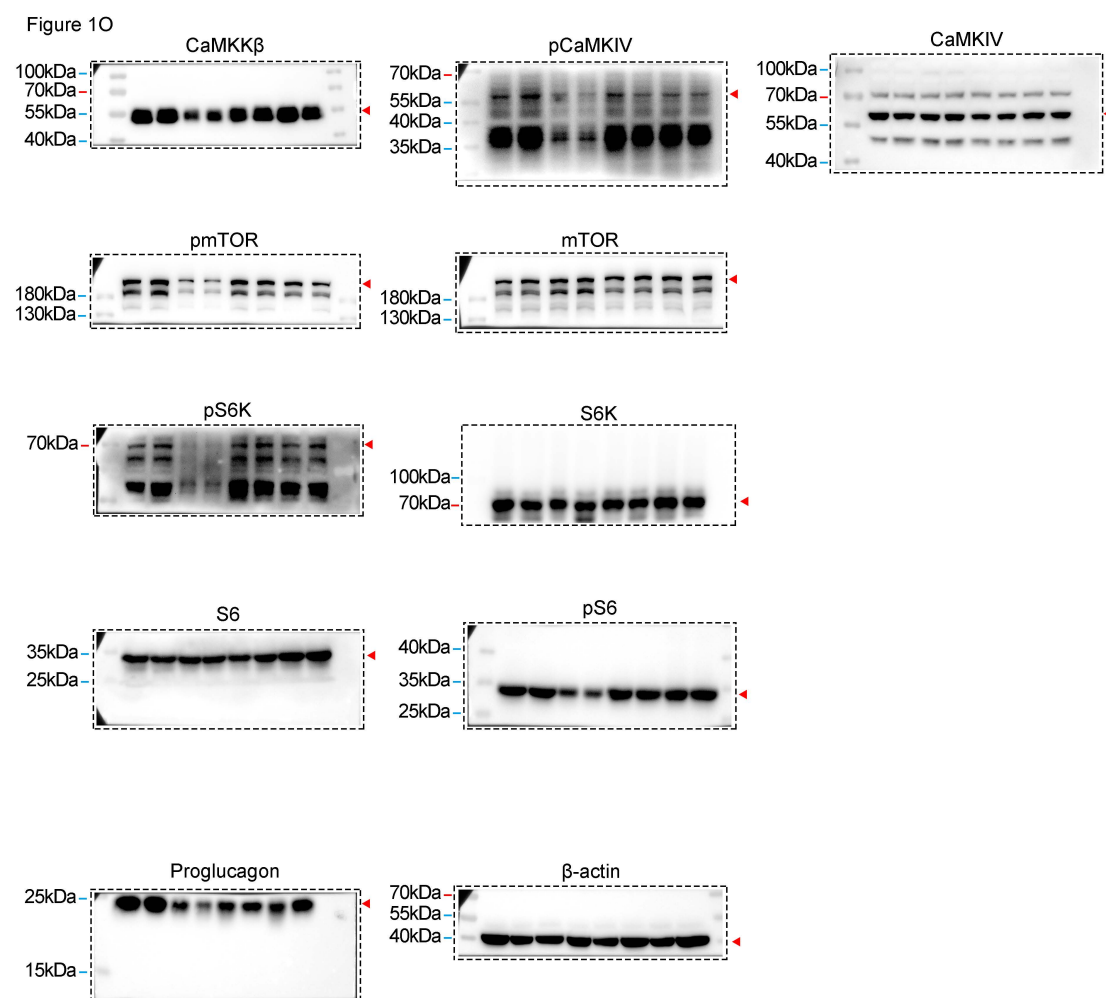

**Figure 1, Source Data 1.**Original membranes corresponding to Figure 1, panel B, C and O. Among them, the WB strips of figure 1O are *Piezo1*<sup>loxP/loxP</sup> in lane 1, 2, *Piezo1* IntL-CKO in lane 3, 4, *Vil1*<sup>Flp</sup> in lane 5, 6, and *Gcg*<sup>cre</sup> in lane 7,8.
