# Supplementary material for: Mechano-regulation of GLP-1 production by Piezo1 in intestinal L cells
Source: eLife journal article supplement (doi:10.7554/elife.97854), 2024-06-19
Supplement: fig1-data3 [file elife-97854-fig1-data3-v1.zip]

## Sheet: Fig1G
NCD
body weight(g)	Piezo1loxp/loxp	Piezo1 IntL-CKO	Vil1Flp	Gcgcre	Vil1FLP::GcgfrtCre
#1	21.8	27.3	23.1	22.1	21.4
#2	21.9	27.9	21.4	22.6	23.1
#3	22	25.1	20.7	20	22
#4	21.6	23.5	19.7	22.2	20.2
#5	16	25.5	22.1	23.1	21.3
#6	20	26.6	20.6	21.1	22.4
Mean	20.55	25.98	21.27	21.85	21.73
Std. Error of Mean	0.9591	0.6575	0.4931	0.4581	0.4096
P value	Piezo1loxp/loxp VS Piezo1 IntL-CKO	Piezo1 IntL-CKO VS Vil1Flp	Piezo1 IntL-CKO VS Ccgcre	Piezo1 IntL-CKO VS Vil1FLP::GcgfrtCre
	<0.0001	0.0002	0.0008	0.0006

## Sheet: Fig1H
	NCD	Blood glucose levels (mmol/l)
IPGTT	mouse	0	15	30	60	90	120	AUC
Piezo1loxp/loxp	#1	7.7	16.8	12.3	10.7	9.3	6.7	1287
	#2	5.5	16.9	11.7	8.4	8.9	7.4	1188
	#3	4.8	14.3	10.4	8.3	7	6.1	1035
	#4	6.8	16.4	13	11.3	9.4	6.1	1302
	#5	7.8	15.3	12.2	9.4	9.2	6.3	1215
	#6	7.2	18.4	16.1	10.8	10.5	7.3	1441
	Mean	6.63333	16.35	12.6167	9.81667	9.05	6.65	1245
	Std. Error of Mean	0.499778	0.577783	0.781203	0.530042	0.466726	0.239096	55.28
Piezo1 IntL-CKO	#1	8.4	18.9	19.6	11.7	9.8	8.7	1563
	#2	8.2	18.9	19.2	10.6	10	8.9	1529
	#3	8.3	19.2	16.6	9.6	8.4	7.8	1381
	#4	8	18.4	17.6	10.5	8.4	7.5	1412
	#5	8	21.8	25.7	15	10.5	8.6	1859
	#6	11.2	26.6	26.4	11.9	10.1	8.6	1866
	Mean	8.68333	20.6333	20.85	11.55	9.53333	8.35	1602
	Std. Error of Mean	0.507554	1.29117	1.70524	0.77147	0.370285	0.229129	87.09
Vil1Flp	#1	5.9	20.4	11.9	10.8	9.7	7.7	1349
	#2	4.9	20.1	15.9	8.8	9	7.2	1338
	#3	5.4	14.4	12.4	10.7	10	6.7	1257
	#4	5.8	17.5	15.4	9.7	9.2	6.2	1313
	#5	6.6	16.1	12.9	10	8.5	7.1	1243
	#6	6.2	13.5	9.8	9.6	9.7	7.5	1161
	Mean	5.8	17	13.05	9.93333	9.35	7.06667	1277
	Std. Error of Mean	0.243584	1.17246	0.930502	0.305141	0.226201	0.223109	28.99
Gcgcre	#1	5.4	19	18.2	9.4	8.8	7.7	1397
	#2	6.3	15.4	11.9	10.4	9.4	7.9	1259
	#3	5.7	18.3	15	12.2	9.9	7.9	1436
	#4	5.2	15.5	11.2	8.2	7.8	6.8	1106
	#5	9.1	22.4	16.1	12.4	10	6.4	1535
	#6	6.6	18	12	9.8	8.9	6.2	1244
	Mean	6.38333	18.1	14.0667	10.4	9.13333	7.15	1330
	Std. Error of Mean	0.585045	1.05515	1.14416	0.669328	0.334332	0.317017	63.34
Vil1FLP::GcgfrtCre	#1	9.2	18.8	13.9	10	9.9	8.9	1394
	#2	8.4	18.4	15.5	9.7	8.5	8	1354
	#3	8.5	20.5	17	10.3	10.4	9.3	1514
	#4	5	21.1	19.1	6.7	5.4	5.4	1228
	#5	6.1	20.6	19	9	7.5	7	1382
	#6	8.9	17.5	12.5	9.4	7.8	7	1232
	Mean	7.68333	19.4833	16.1667	9.18333	8.25	7.6	1351
	Std. Error of Mean	0.699246	0.590715	1.10081	0.530042	0.736998	0.585947	44.23
	AUC
P value	Piezo1loxp/loxp VS Piezo1 IntL-CKO	Piezo1 IntL-CKO VS Vil1Flp	Piezo1 IntL-CKO VS Ccgcre	Piezo1 IntL-CKO VS Vil1FLP::GcgfrtCre
	0.0357	0.0039	0.0025	0.0345

## Sheet: Fig1I
	NCD	Blood glucose levels (mmol/l)
ITT	mouse	0	15	30	60	90	120	AUC
Piezo1loxp/loxp	#1	7.4	7.2	6.2	6.6	5.8	6.3	769.5
	#2	6.8	5.2	5	5	3.9	4.7	579
	#3	7.2	4.6	4.6	4.4	5	4.9	582
	#4	7.5	4.2	4.1	4.5	5	6.1	588
	#5	6.8	6.8	6.7	6.3	6.7	6.8	795.8
	#6	6.1	5	4.9	5.8	5.7	5.5	658.5
	Mean	6.96667	5.5	5.25	5.43333	5.35	5.71667	662.1
	Std. Error of Mean	0.210819	0.497326	0.405586	0.381809	0.387083	0.337062	40.1
Piezo1 IntL-CKO	#1	8.5	5.6	4.5	5.8	8.3	7.9	790.5
	#2	8.3	5.3	5.1	5.9	6.1	6.9	720
	#3	8	4	5.8	6.8	7.4	6.7	777
	#4	7.9	7.9	6.3	6.8	7.7	7.3	864
	#5	9.4	9.3	6.3	7.5	7.3	8.3	920.3
	#6	9.9	5.7	7.3	7.9	7.8	8.7	925.5
	Mean	8.66667	6.3	5.88333	6.78333	7.43333	7.63333	832.9
	Std. Error of Mean	0.329309	0.789515	0.403664	0.341971	0.302948	0.325235	34.08
Vil1Flp	#1	9.7	4.2	4.7	5	5.5	6.4	652.5
	#2	8.2	5.3	4.8	4.7	5	5.8	627
	#3	6.9	4.1	4.2	5.1	4.7	6.1	593.3
	#4	6.3	5	4.4	4.3	3.4	4.3	516.8
	#5	8.4	5.5	4.9	4.7	5	5.6	630.8
	#6	7.4	4.3	5.3	5.4	5.4	5.3	642.8
	Mean	7.81667	4.73333	4.71667	4.86667	4.83333	5.58333	610.5
	Std. Error of Mean	0.494919	0.248551	0.157938	0.156347	0.310555	0.300463	20.47
Gcgcre	#1	7.1	3.6	4.3	4.9	4.2	4.4	543
	#2	7.8	6.3	4.7	4.9	4.8	5.9	638.3
	#3	8.8	6	4.6	3.6	3.2	4.2	526.5
	#4	5.4	3.9	4	4.3	4.2	4.6	513
	#5	10.1	5.9	6.6	6	6	7.5	785.3
	#6	8.4	5.4	4.9	5	4.1	4.8	599.3
	Mean	7.93333	5.18333	4.85	4.78333	4.41667	5.23333	600.9
	Std. Error of Mean	0.653027	0.470047	0.37305	0.326003	0.379839	0.514242	41.64
Vil1FLP::GcgfrtCre	#1	8.8	6.8	5.2	6.4	6.3	6.5	763.5
	#2	7.9	6	5.1	4.9	5.9	7.1	694.5
	#3	9.9	6.2	5.5	6.2	6.5	7.3	781.5
	#4	5.8	4.1	4.3	4.4	3.8	4.1	509.3
	#5	9	6.3	5.1	5	6.2	7.5	725.3
	#6	6.4	4.3	4.2	3.8	3.7	4.1	493.5
	Mean	7.96667	5.61667	4.9	5.11667	5.4	6.1	661.3
	Std. Error of Mean	0.649444	0.461459	0.214476	0.413454	0.527889	0.647045	52.07
	AUC
P value	Piezo1loxp/loxp VS Piezo1 IntL-CKO	Piezo1 IntL-CKO VS Vil1Flp	Piezo1 IntL-CKO VS Ccgcre	Piezo1 IntL-CKO VS Vil1FLP::GcgfrtCre
	0.0357	0.0039	0.0025	0.0345

## Sheet: Fig1J
NCD mouse ileum qpcr
Gcg/β-actin mRNA levels	Piezo1loxp/loxp	Piezo1 IntL-CKO	Vil1Flp	Gcgcre
#1	1.19835	0.358749	1.05048	0.660233
#2	0.801652	0.125091	0.545529	1.21508
#3	1.18569	0.270003	0.912095	0.815483
#4	0.892378	0.193586	0.297518	1.52175
#5	1.08352	0.281469	2.05015	0.771494
#6	0.83841	0.274662	0.94326	1.6197
Mean	1	0.2506	0.9665	1.101
Std. Error of Mean	0.07253	0.03297	0.2456	0.1677
P value	Piezo1loxp/loxp VS Piezo1 IntL-CKO	Piezo1 IntL-CKO VS Vil1Flp	Piezo1 IntL-CKO VS Ccgcre
	0.0126	0.0177	0.0045

## Sheet: Fig1K
NCD
plasma GLP-1 (pmol/l)	Piezo1loxp/loxp	Piezo1 IntL-CKO	Vil1Flp	Gcgcre
#1	4.45	3.76	4.19	4.77
#2	4.4	3.58	3.96	5.43
#3	4.54	3.81	6.03	4.67
#4	5.77	3.89	5.9	4.51
#5	5.22	3.73	5.14	5.35
#6	5.09	3.66	6.42	6.08
Mean	4.912	3.738	5.273	5.135
Std. Error of Mean	0.2219	0.04468	0.4162	0.2426
P value	Piezo1loxp/loxp VS Piezo1 IntL-CKO	Piezo1 IntL-CKO VS Vil1Flp	Piezo1 IntL-CKO VS Ccgcre
	0.0139	0.0026	0.006

## Sheet: Fig1M
NCD	Piezo1loxp/loxp	Piezo1 IntL-CKO
Piezo1 positive GLP-1 cell / total GLP-1 cell	FISH	FISH
#1	1	0
#2	1	0
#3	1	0
#4	0.75	0
#5	1	0
#6	0.833333	0
Mean	0.9306	0
Std. Error of Mean	0.04522	0
P value	Piezo1loxp/loxp VS Piezo1 IntL-CKO
	<0.0001

## Sheet: Fig1O
	NCD mouse ileum	grey value (fold change)
Piezo1loxp/loxp	Western blot	CaMKK2/b-actin	pCaMK4/CaMK4	pmTOR/mTOR	ps6k/s6k	ps6/s6	GLP-1/b-actin
	#1	0.909382	1.03523	1.05945	0.841761	1.06031	0.9285
	#2	1.1623	0.985563	1.06544	1.10064	1.09111	1.1471
	#3	0.925473	0.798433	1.00073	0.942608	0.933857	0.924326
	#4	0.903587	0.986375	0.853902	1.06027	0.967137	0.890796
	#5	1.1009	1.1258	0.954424	0.82685	0.960884	1.02223
	#6	0.998359	1.0686	1.06605	1.22788	0.986702	1.08704
	Mean	1	1	1	1	1	1
	Std. Error of Mean	0.0445667	0.0457512	0.0344488	0.0642915	0.0252323	0.0418224
Piezo1 IntL-CKO	#1	0.579609	0.49907	0.463456	0.411777	0.621793	0.838925
	#2	0.560243	0.386231	0.416058	0.36317	0.60453	0.686506
	#3	0.809209	0.438033	0.624589	0.276399	0.709423	0.659687
	#4	0.604746	0.433612	0.392517	0.337938	0.598491	0.586877
	#5	0.609639	0.423465	0.1725	0.343872	0.472036	0.717488
	#6	0.64218	0.312348	0.479622	0.297863	0.500315	0.805888
	Mean	0.634271	0.41546	0.42479	0.338503	0.584431	0.715895
	Std. Error of Mean	0.0367933	0.0254166	0.0603295	0.0195918	0.0352745	0.0382563
Vil1Flp	#1	1.03373	1.17607	1.04541	0.851817	1.08325	0.894812
	#2	0.882692	1.06934	1.01628	1.05787	0.912128	0.769694
	#3	0.913849	0.863625	0.9882	0.877201	0.99513	0.986141
	#4	0.925007	0.939671	0.928658	1.21073	1.0758	0.919601
	#5	0.965696	0.825108	0.876548	0.851848	0.985721	0.947941
	#6	1.11513	0.806205	0.996038	0.877673	0.903063	1.10852
	Mean	0.972684	0.94667	0.975189	0.954524	0.992515	0.937785
	Std. Error of Mean	0.035543	0.0603119	0.0252445	0.06036	0.0314567	0.0454693
Gcgcre	#1	0.96023	1.01392	1.00388	0.942111	1.17616	0.981508
	#2	0.863102	1.19035	0.961234	0.821895	1.14785	0.85597
	#3	0.98636	1.04517	1.0523	1.00688	0.898874	0.81596
	#4	1.07085	1.0584	0.827668	1.00367	0.923045	0.958138
	#5	1.09113	0.817398	0.87852	0.784542	0.987465	1.1399
	#6	1.06568	0.988806	0.994004	1.09671	1.023	1.04935
	Mean	1.00623	1.01901	0.952935	0.942635	1.02606	0.966803
	Std. Error of Mean	0.0355503	0.0493897	0.0343773	0.0487046	0.0467795	0.0490251
	CaMKK2/b-actin
P value	Piezo1loxp/loxp VS Piezo1 IntL-CKO	Piezo1 IntL-CKO VS Vil1Flp	Piezo1 IntL-CKO- VS Gcgcre
	<0.0001	<0.0001	<0.0001
	pCaMK4/CaMK4
P value	Piezo1loxp/loxp VS Piezo1 IntL-CKO	Piezo1 IntL-CKO VS Vil1Flp	Piezo1 IntL-CKO- VS Gcgcre
	<0.0001	<0.0001	<0.0001
	pmTOR/mTOR
P value	Piezo1loxp/loxp VS Piezo1 IntL-CKO	Piezo1 IntL-CKO VS Vil1Flp	Piezo1 IntL-CKO- VS Gcgcre
	<0.0001	<0.0001	<0.0001
	ps6k/s6k
P value	Piezo1loxp/loxp VS Piezo1 IntL-CKO	Piezo1 IntL-CKO VS Vil1Flp	Piezo1 IntL-CKO- VS Gcgcre
	<0.0001	<0.0001	<0.0001
	ps6/s6
P value	Piezo1loxp/loxp VS Piezo1 IntL-CKO	Piezo1 IntL-CKO VS Vil1Flp	Piezo1 IntL-CKO- VS Gcgcre
	<0.0001	<0.0001	<0.0001
	GLP-1/b-actin
P value	Piezo1loxp/loxp VS Piezo1 IntL-CKO	Piezo1 IntL-CKO VS Vil1Flp	Piezo1 IntL-CKO- VS Gcgcre
	0.001	0.0093	0.0032
