# Supplementary material for: Mechano-regulation of GLP-1 production by Piezo1 in intestinal L cells
Source: eLife journal article supplement (doi:10.7554/elife.97854), 2024-06-19
Supplement: fig1-figsupp1-data1 [file elife-97854-fig1-figsupp1-data1-v1.zip]

Figure 1—figure supplement 1E

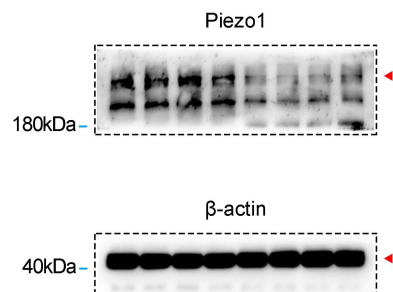

**Figure 1, Figure supplement 1, Source Data 1.**Original membranes corresponding to Figure Supplement 2. C57BL/6J mice were subjected to different feeding treatments: lanes 1, 2, and 3 represent normal diet feeding, while lanes 4, 5, and 6 correspond to high-fat feeding treatments.
