# Supplementary material for: Mechano-regulation of GLP-1 production by Piezo1 in intestinal L cells
Source: eLife journal article supplement (doi:10.7554/elife.97854), 2024-06-19
Supplement: fig1-figsupp1-data3 [file elife-97854-fig1-figsupp1-data3-v1.zip]

## Sheet: FigS1A
C57BL/6J
Piezo1 mRNA levels	STC-1	ileum	hypothalamus	liver	epididymal adipose	skeletal muscle	pancreas
#1	0.36	0.72	0.51	1.1	4.51	0.32	0.96
#2	0.35	0.94	0.34	0.91	5.67	0.54	1.25
#3	0.81	1.34	0.68	0.86	5.14	0.68	0.32
Mean	0.5067	1	0.51	0.9567	5.107	0.5133	0.8433
Std. Error of Mean	0.1517	0.1815	0.09815	0.07311	0.3353	0.1048	0.2747

## Sheet: FigS1C
	C57BL/6J
body weight(g)	NCD	HFD
#1	26.6	32.6
#2	26.2	34.5
#3	23	35.1
#4	26.8	33.9
#5	25.9	35.1
#6	24.8	36
Mean	25.55	34.53
Std. Error of Mean	0.5852	0.4807
P value	NCD vs. HFD
	<0.0001

## Sheet: FigS1D
	C57BL/6J	Blood glucose levels (mmol/l)
IPGTT	mouse	0	15	30	60	90	120	AUC
Piezo1 loxp/loxp	#1	8.9	15.1	11.6	9.2	8.3	8.6	1208
	#2	8.4	14.6	17.4	11.7	10.2	6.9	1434
	#3	6.7	15.5	14	9.9	7.8	6.9	1232
	#4	7.4	15	14.8	10	7.2	7.8	1247
	#5	7.7	13.2	14.3	10.3	8.5	7.3	1251
	#6	9.5	12.7	11.4	9.5	7.4	7.9	1144
	Mean	8.1	14.35	13.9167	10.1	8.23333	7.56667	1253
	Std. Error of Mean	0.420317	0.462421	0.908631	0.356838	0.443221	0.270391	39.64
Piezo1 Intl-CKO	#1	10	30.1	29.4	27.5	24.5	17.5	3011
	#2	11.2	18.4	20.7	18.9	16	12.8	2065
	#3	10.8	20.8	18.5	17.3	16.6	11.4	1997
	#4	12.3	21.1	18.2	19.1	16.3	12.5	2068
	#5	13.3	26.2	22.1	20.6	17.8	14.2	2355
	#6	10.4	22.8	24.8	24	19.3	13.4	2478
	Mean	11.3333	23.2333	22.2833	21.2333	18.4167	13.6333	2329
	Std. Error of Mean	0.508374	1.73179	1.73694	1.5577	1.31388	0.862039	156.6
	AUC
P value	NCD vs. HFD
	<0.0001

## Sheet: FigS1E
	C57BL/6J mouse ileum	grey value (fold change)
	Western blot	Piezo1/b-actin
NCD	#1	1.01735
	#2	0.982613
	#3	1.03882
	#4	0.950258
	#5	1.02336
	#6	0.987591
	Mean	1
	Std. Error of Mean	0.01327
HFD	#1	0.489042
	#2	0.40762
	#3	0.265604
	#4	0.354401
	#5	0.228716
	#6	0.310888
	Mean	0.3427
	Std. Error of Mean	0.03904
	Piezo1/b-actin
P value	NCD vs. HFD
	<0.0001

## Sheet: FigS1F
mouse ileum qpcr	C57BL/6J			mouse ileum qpcr	C57BL/6J
Piezo1/β-actin mRNA levels	NCD	HFD		Gcg/β-actin mRNA levels	NCD	HFD
#1	0.904	0.22		#1	0.946	0.469
#2	0.89	0.316		#2	0.916	0.626
#3	1.23	0.362		#3	1.101	0.649
#4	1.277	0.222		#4	1.173	0.563
#5	0.725	0.186		#5	0.914	0.056
#6	1.08	0.213		#6	0.979	0.057
Mean	1	0.253167		Mean	1	0.403333
Std. Error of Mean	0.0877681	0.0282777		Std. Error of Mean	0.0438934	0.112594
	Piezo1/b-actin				Gcg/β-actin
P value	NCD vs. HFD			P value	NCD vs. HFD
	<0.0001				0.0006

## Sheet: FigS1G
Piezo1 mRNA level	GCG mRNA level
X axis	Y axis
0.904	0.946
0.89	0.916
1.23	1.101
1.277	1.173
0.725	0.914
1.08	0.979
0.22	0.469
0.316	0.626
0.362	0.649
0.222	0.563
0.186	0.056
0.213	0.057
Pearson r
r	0.8903
95% confidence interval	0.6470 to 0.9691
R squared	0.7926
P value
P (two-tailed)	0.0001
P value summary	***
Significant? (alpha = 0.05)	Yes

## Sheet: FigS1H
Piezo1 mRNA level	AUC
X axis	Y axis
0.904	1247
0.89	1251
1.23	1434
1.277	1208
0.725	1144
1.08	1232
0.22	2068
0.316	2065
0.362	3011
0.222	1997
0.186	2478
0.213	2355
Pearson r
r	-0.8017
95% confidence interval	-0.9421 to -0.4219
R squared	0.6427
P value
P (two-tailed)	0.0017
P value summary	**
Significant? (alpha = 0.05)	Yes

## Sheet: FidS1I
	Human
BMI	obese type2 diabetic	Post-RYGB
#1	37.2	25.3
#2	39.9	22.8
#3	56.4	30
#4	38.09	26.5
#5	65.3	22.9
#6	38.3	25.4
Mean	45.87	25.48
Std. Error of Mean	4.889	1.085
	BMI
P value	obese type2 diabetic vs. Post-RYGB
	0.0023

## Sheet: FigS1J
ileum qpcr	Human
Piezo1/β-actin mRNA levels	obese type2 diabetic	Post-RYGB
#1	1.02222	10.4
#2	1.46667	9.6
#3	0.511111	5.66667
#4	2.0625	4
#5	0.8125	13.6875
#6	0.125	9.875
Mean	1	8.872
Std. Error of Mean	0.2821	1.427
P value	obese type2 diabetic vs. Post-RYGB
	0.0003

## Sheet: FigS1K
Human				Human
Quantitation of Piezo1 in GLP-1 positive cells	obese type2 diabetic	Post-RYGB		Piezo1 positive GLP-1 cell / total GLP-1 cell	obese type2 diabetic	Post-RYGB
#1	1.37	2.94		#1	1	1
#2	0.59	2.41		#2	0	1
#3	0.76	3.23		#3	0	1
#4	0.91	3.11		#4	0	0.857143
#5	1.74	2.75		#5	0.571429	0.666667
#6	0.63	1.94		#6	0.333333	0.888889
Mean	1	2.73		Mean	0.3175	0.9021
Std. Error of Mean	0.1875	0.1971		Std. Error of Mean	0.1666	0.05366
P value	obese type2 diabetic vs. Post-RYGB			P value	obese type2 diabetic vs. Post-RYGB
	<0.0001				0.0075
