# Supplementary material for: Mechano-regulation of GLP-1 production by Piezo1 in intestinal L cells
Source: eLife journal article supplement (doi:10.7554/elife.97854), 2024-06-19
Supplement: fig1-figsupp2-data1 [file elife-97854-fig1-figsupp2-data1-v1.zip]

## Sheet: FigS2A
		Food intake (g)
	Time/h	Piezo1 loxp/loxp										Piezo1 Intl-CKO
		#1	#2	#3	#4	#5	#6	#7	#8	Mean	Std. Error of Mean	#1	#2	#3	#4	#5	#6	#7	#8	Mean	Std. Error of Mean
	7	0	0	0	0	0	0	0	0	0	0	0.5759	0.1198	0.283	0	0	0	0	0	0.122338	0.0739655
	8	0	0.2653	0	0.005	0	0.0013	0	0	0.03395	0.0330557	0.0037	0	0	0.6135	0	0	0	0.0047	0.0777375	0.0765405
	9	0	0.1646	0	0	0	0	0	0	0.020575	0.020575	0	0	0	0	0	0	0	0	0	0
	10	0	0	0	0.0051	0	0	0	0	0.0006375	0.0006375	0	0.1072	0	0	0.0226	0	0.154	0	0.035475	0.0214021
	11	0	0	0	0	0.0598	0	0	0	0.007475	0.007475	0.0495	0	0	0.2292	0.0095	0	0.0189	0.0028	0.0387375	0.0278495
	12	0	0.0842	0	0.1509	0	0	0	0	0.0293875	0.0202447	0	0	0	0	0	0	0	0.0179	0.0022375	0.0022375
	13	0	0.3617	0	0	0.0549	0	0	0.1645	0.0726375	0.0460379	0	0	0	0	0	0	0	0.3175	0.0396875	0.0396875
	14	0	0	0.089	0.376	0.286	0	0	0	0.093875	0.0535512	0	0	0	0	0	0	0	0.2225	0.0278125	0.0278125
	15	0.0902	0	0	0	0.4183	0	0	0	0.0635625	0.0518909	0.0108	0	0	0.3123	0	0	0.0658	0.5299	0.11485	0.0703623
	16	0	0.0075	0.2723	0	0.0314	0	0	0.3352	0.0808	0.0491571	0	0.1359	0	0.0265	0	0	0	0	0.0203	0.0168366
	17	0.0094	0.0102	0.2858	0	0	0	0.1538	0	0.0574	0.0376	0	0	0	0	0	0.0811	0	0	0.0101375	0.0101375
	18	0	0	0.0045	0	0	0	0	0	0.0005625	0.0005625	0	0	0	0	0	0.4824	0	0	0.0603	0.0603
	19	0	0	0	0	0	0	0.0348	0	0.00435	0.00435	0.0525	0	0.0031	0	0.0435	0.0337	0.0491	0	0.0227375	0.00852377
	20	0	0.2978	0.0025	0.0557	0	0	0	0	0.0445	0.0368277	0	0	0.0698	0	0	0	0.121	0	0.02385	0.0163458
	21	0.1004	0	0	0.0076	0	0	0	0	0.0135	0.0124498	0	0.1256	0	0	0.0255	0.0451	0	0	0.024525	0.0156112
	22	0	0.0133	0.011	0.0463	0.0336	0	0	0	0.013025	0.0062868	0.0175	0	0	0	0	0	0	0.0008	0.0022875	0.00217547
	23	0.2031	0	0.1327	0.3453	0.1191	0	0	0.3561	0.144538	0.052091	0.0417	0.067	0	0	0.0044	0.141	0.5243	0.0147	0.0991375	0.0630489
	24	0	0.8225	0.0801	0	0	0.0744	0	0.0248	0.125225	0.100323	0.1127	0.277	0.0844	0	0	0.0047	0	0	0.05985	0.034826
	1	0.4661	0.6941	0.2466	1.2166	0.8588	0.0398	0	0.0563	0.447288	0.157078	0.0782	0.1912	0.0841	0	0	0	0.0185	0.1598	0.066475	0.026817
	2	0.2335	0.2692	0.2024	0.0168	0	0.0271	0.0463	0	0.0994125	0.0405441	0.2944	0.4641	0.2914	0.0706	0.0221	0	0.1763	0.0464	0.170662	0.058657
	3	0.252	0.0011	0	0.2777	0.5213	0.0228	0.0394	0.0075	0.140225	0.0677707	0	0	0.086	0.1207	0.0386	0	0.2917	0.1609	0.0872375	0.0362405
	4	0	0.5873	0.8662	0.0755	0	0	0	0	0.191125	0.120171	0.2667	0	0.2759	0.1722	0	0.5906	0.49	0.186	0.247675	0.074362
	5	0	0.2034	0	0	0	0.0063	0	0	0.0262125	0.0253245	0.1121	0.3958	0.1992	0.2234	0	0	0.0632	0	0.124213	0.0498885
	6	0	0	0.0114	0	0	0	0	0	0.001425	0.001425	0.5375	0.403	0.4803	0.1413	0.0725	0	0	0	0.204325	0.081639
		Piezo1 loxp/loxp										Piezo1 Intl-CKO
		#1	#2	#3	#4	#5	#6	#7	#8	Mean	Std. Error of Mean	#1	#2	#3	#4	#5	#6	#7	#8	Mean	Std. Error of Mean
	light	0.0996	0.8935	0.6516	0.537	0.8504	0.0013	0.1538	0.4997	0.460863	0.120904	0.6399	0.3629	0.283	1.1815	0.0321	0.5635	0.2387	1.0953	0.549612	0.144903
	dark	1.2551	2.8887	1.5529	2.0415	1.5328	0.1704	0.1205	0.4447	1.25083	0.34261	1.5133	1.9237	1.5742	0.7282	0.2066	0.8151	1.7341	0.5686	1.13298	0.222305
		light	dark
	P value	Piezo1 loxp/loxp vs. Piezo1 Intl-CKO	Piezo1 loxp/loxp vs. Piezo1 Intl-CKO
		0.6454	0.7771

## Sheet: FigS2B
	Water intake (g)
Time/h	Piezo1 loxp/loxp										Piezo1 Intl-CKO
	#1	#2	#3	#4	#5	#6	#7	#8	Mean	Std. Error of Mean	#1	#2	#3	#4	#5	#6	#7	#8	Mean	Std. Error of Mean
7	0	0	0	0	0	0	0	0	0	0	0.5761	1.643	0.1311	0.5304	0	0	0	0.0314	0.364	0.201373
8	0	0	0.2518	0	0	0.0517	0	0	0.0379375	0.0312142	0.9896	0.5031	0	0	0.0259	0	0.0732	0	0.198975	0.128294
9	0.0031	0	0.0909	0	0	0	0.0573	0.0583	0.0262	0.0129994	0.1639	0	0	0	0	0.1397	0	0	0.03795	0.0249491
10	0	0.1329	0	0.3327	0.0235	0	0	0.0348	0.0654875	0.0413621	0.6411	0.0946	0.7497	0.4518	0	0.0038	0.0032	0.2257	0.271238	0.107615
11	0	0	0	0.2251	0.0067	0.0457	0.2237	0.0139	0.0643875	0.0353231	0.0578	0.1488	0.0233	0.0478	0	0	0.0558	0.071	0.0505625	0.0169095
12	0.0265	0	0.2386	0	0	0.1036	0	0.1247	0.061675	0.0309045	0.3616	0	0	0	0.011	0.0157	0.0051	0	0.049175	0.0446819
13	0.2903	0	0.2559	0	0.7707	0	0.0519	0.0748	0.18045	0.0936872	1.1136	0.1359	0.2933	0.1002	0.2104	0	0.0584	0	0.238975	0.129934
14	0.2934	0.0897	0.1186	0.1165	0.3935	0	0	0	0.126463	0.0515246	0.1149	0	0	0.3896	0.0458	0	0	0.0687	0.077375	0.0470396
15	0	0.3872	0	0	0.1172	0.1408	0.0409	0.2581	0.118025	0.0500595	0.0932	0.3925	0	0	0.2035	0.0631	0	0.1169	0.10865	0.0476901
16	0	0	0.0184	0.0513	0.0095	0	0.0948	0.4454	0.077425	0.0538635	0.5432	0	0.5485	0.2607	0	0	0	0	0.16905	0.0881618
17	0	0	0	0.045	0	0.0487	0.3481	0.0941	0.0669875	0.0419452	0.7894	0	0.0719	0	0.0202	0	0.2668	0	0.143538	0.0977504
18	0	0	0	0	0	0	0	0	0	0	1.0885	0	0.1146	0.0962	0	0.1522	0.4656	0	0.239638	0.13281
19	0	0.0229	0	0	0	0.0487	0.0058	0	0.009675	0.00624056	0.3385	0.1716	0.4421	0.3716	0	0	0.1268	0.1088	0.194925	0.0599877
20	0	0	0.1786	0	0	0.0487	0	0.0043	0.02895	0.0221937	0	0	0	0	0	0.0038	0	0.09	0.011725	0.011192
21	0.1683	0.0829	0	0	0	0.0487	0.2945	0	0.0743	0.0378284	0.1268	0.2645	0.4362	0	0.0238	0	0.1341	0	0.123175	0.0556586
22	0	0	0	0.0043	0	0	0	0.0055	0.001225	0.000809927	0.0435	0	0	0	0	0.0127	0	0	0.007025	0.00544245
23	0.1329	0	0	0.1741	0	0.0044	0	0.118	0.053675	0.0263454	0.5341	0.1693	0.2957	0.1984	0.0577	0.061	0.1385	0.1105	0.19565	0.0555713
24	0.1614	0.3048	0.5247	0	0.0057	0.0712	0.0029	0.3869	0.1822	0.07115	0.141	0.8345	0.5083	0.3005	0.1795	0.0744	0.0352	0	0.259175	0.100584
1	0.1018	0.4587	0.6204	0.2931	0.2496	0.0665	0.1779	0	0.246	0.0738985	0.2435	0.6987	0.5543	0	0	0.0318	0.0953	0.0347	0.207288	0.096573
2	0.032	0.0685	0.463	0.3865	0	0.0069	0.1316	0	0.136063	0.0652919	0.5394	1.5206	0.4587	0.4801	0.0682	0.1275	0.2011	0.1672	0.44535	0.166191
3	0.0854	0.2705	0.0527	0.2972	0.0831	0.0655	0	0.1469	0.125163	0.0375639	0.4375	0.0114	0	0	0.0097	0	0.1366	0.4392	0.1293	0.0693643
4	0.064	0	0.6367	0.1374	0	0.0055	0	0	0.10545	0.0778545	0.2421	1.3153	0	0.9477	0.017	0.1019	0.0711	0.2385	0.3667	0.173392
5	0	0	0.236	0	0	0.1419	0	0	0.0472375	0.0321771	0.3122	0.2927	0.7762	0.1264	0	0.0232	0	0.0402	0.196362	0.0940454
6	0	0	0.1077	0	0	0	0	0	0.0134625	0.0134625	0.1875	1.0625	0.7319	1.0048	0	0	0	0	0.373337	0.16873
	Piezo1 loxp/loxp										Piezo1 Intl-CKO
	#1	#2	#3	#4	#5	#6	#7	#8	Mean	Std. Error of Mean	#1	#2	#3	#4	#5	#6	#7	#8	Mean	Std. Error of Mean
light	0.6133	0.6098	0.9742	0.7706	1.3211	0.3905	0.8167	1.1041	0.825	0.106	6.5329	2.9179	1.9324	1.8767	0.5168	0.3745	0.9281	0.5137	1.949	0.7269
dark	0.7458	1.2083	2.8198	1.2926	0.3384	0.508	0.6127	0.6616	1.023	0.2817	3.1461	6.3411	4.2034	3.4295	0.3559	0.4363	0.9387	1.2291	2.51	0.7541
	light	dark
P value	Piezo1 loxp/loxp vs.Piezo1 Intl-CKO	Piezo1 loxp/loxp vs. Piezo1 Intl-CKO
	0.1482	0.086
