# Supplementary material for: Mechano-regulation of GLP-1 production by Piezo1 in intestinal L cells
Source: eLife journal article supplement (doi:10.7554/elife.97854), 2024-06-19
Supplement: fig1-figsupp3-data3 [file elife-97854-fig1-figsupp3-data3-v1.zip]

## Sheet: FigS3B
NCD mouse pancreas qpcr
Piezo1/β-actin mRNA levels	Piezo1 loxp/loxp	Piezo1 Intl-CKO	Vil1Flp	Gcgcre	Vil1FLP::GcgfrtCre
#1	1.2541	0.557103	1.57581	3.10108	2.28676
#2	0.436971	0.68524	0.884376	0.199512	3.371
#3	1.30408	1.98066	1.34009	0.253883	0.34737
#4	1.42997	0.852748	0.494656	3.23642	0.465669
#5	1.20924	2.36093	4.31403	2.58781	1.61484
#6	0.365632	1.14624	1.29541	2.85661	1.42831
Mean	1	1.264	1.651	2.039	1.586
Std. Error of Mean	0.1919	0.3019	0.5551	0.5803	0.4652
	P value
Piezo1 Intl-CKOvs. Piezo1 loxp/loxp	0.9803
Piezo1 Intl-CKO vs. Vil1Flp	0.9271
Piezo1 Intl-CKO vs.Gcgcre	0.5557
Piezo1 Intl-CKO vs. Vil1FLP::GcgfrtCre	0.9604

## Sheet: FigS3C
NCD mouse pancreas qpcr
Gcg/β-actin mRNA levels	Piezo1 loxp/loxp	Piezo1 Intl-CKO	Vil1Flp	Gcgcre	Vil1FLP::GcgfrtCre
#1	1.33055	1.49235	1.76385	0.67134	2.84649
#2	1.27702	2.63037	1.64685	0.515449	1.53559
#3	0.869964	2.59415	1.48888	0.636827	0.595405
#4	2.12133	1.04089	0.868924	2.66649	0.280547
#5	0.288969	0.209191	0.529406	0.134972	0.772343
#6	0.112168	0.031822	0.699531	2.55075	0.490957
Mean	1	1.333	1.166	1.196	1.087
Std. Error of Mean	0.303	0.4597	0.2163	0.4537	0.3934
	p value
Piezo1 Intl-CKO vs. Piezo1 loxp/loxp	0.9233
Piezo1 Intl-CKO vs. Vil1Flp	0.9934
Piezo1 Intl-CKO vs. Gcgcre	0.9968
Piezo1 Intl-CKO vs. Vil1FLP::GcgfrtCre	0.9723

## Sheet: FigS3D
	mouse pancreas	grey value (fold change)
Piezo1 loxp/loxp	Western blot	Gcg/b-actin
	#1	1.01994
	#2	0.991628
	#3	1.02417			p value
	#4	1.02289		Piezo1 Intl-CKO vs. Piezo1 loxp/loxp	0.9912
	#5	0.983808		Piezo1 Intl-CKO vs. Vil1Flp	0.9978
	#6	0.957562		Piezo1 Intl-CKO vs. Gcgcre	0.8565
				Piezo1 Intl-CKOvs. Vil1FLP::GcgfrtCre	0.9986
	Mean	1
	Std. Error of Mean	0.01101
Piezo1 Intl-CKO	#1	1.14167
	#2	0.909561
	#3	1.03589
	#4	1.05456
	#5	0.928838
	#6	1.0417
	Mean	1.019
	Std. Error of Mean	0.03522
Vil1Flp	#1	0.817458
	#2	0.90246
	#3	1.09546
	#4	1.0067
	#5	0.982795
	#6	1.23006
	Mean	1.006
	Std. Error of Mean	0.05916
Gcgcre	#1	0.976737
	#2	1.12151
	#3	1.13142
	#4	1.00725
	#5	1.13429
	#6	0.997125
	Mean	1.061
	Std. Error of Mean	0.03058
Vil1FLP::GcgfrtCre	#1	1.10533
	#2	0.964863
	#3	1.06761
	#4	1.18841
	#5	0.923248
	#6	0.931554
	Mean	1.03
	Std. Error of Mean	0.04378
