# Supplementary material for: Mechano-regulation of GLP-1 production by Piezo1 in intestinal L cells
Source: eLife journal article supplement (doi:10.7554/elife.97854), 2024-06-19
Supplement: fig1-figsupp4-data1 [file elife-97854-fig1-figsupp4-data1-v1.zip]

## Sheet: FigS4C
NCD mouse
length of small intestine (cm)	Piezo1 loxp/loxp	Piezo1 Intl-CKO	Vil1Flp	Gcgcre	Vil1FLP::GcgfrtCre
#1	40.6	40.8	39.1	40	41.2
#2	36.5	39.6	37	41.8	41
#3	40.3	40.1	40.4	38.8	39
#4	39.7	40.5	38.1	38.2	40.9
#5	42	39.5	39.2	41.1	42.5
#6	41.9	43.1	42.7	42.2	41.5
Mean	40.17	40.6	39.42	40.35	41.02
Std. Error of Mean	0.8212	0.5404	0.8056	0.6642	0.4672
	p value
Piezo1 Intl-CKO vs. Piezo1 loxp/loxp	0.9867
Piezo1 Intl-CKO vs. Vil1Flp	0.6262
Piezo1 Intl-CKO vs.Gcgcre	0.9975
Piezo1 Intl-CKO vs. Vil1FLP::GcgfrtCre	0.9644

## Sheet: FigS4D
HFD mouse
length of small intestine (cm)	Piezo1 loxp/loxp	Piezo1 Intl-CKO
#1	42.2	40.8
#2	42.1	41.9
#3	42.5	40.5
#4	41	42.3
#5	41.8	41.7
#6	42	40
Mean	41.93	41.2
Std. Error of Mean	0.2092	0.367
p value	Piezo1 Intl-CKO vs. Piezo1 loxp/loxp
	0.1132
