# Supplementary material for: Mechano-regulation of GLP-1 production by Piezo1 in intestinal L cells
Source: eLife journal article supplement (doi:10.7554/elife.97854), 2024-06-19
Supplement: fig1-figsupp5-data1 [file elife-97854-fig1-figsupp5-data1-v1.zip]

## Sheet: FigS5B
duodenum				jejunum				ileum				colon
Piezo1 positive GLP-1 cells / total GLP-1 cells	Piezo1 loxp/loxp	Piezo1 Intl-CKO		Piezo1 positive GLP-1 cells / total GLP-1 cells	Piezo1 loxp/loxp	Piezo1 Intl-CKO		Piezo1 positive GLP-1 cells / total GLP-1 cells	Piezo1 loxp/loxp	Piezo1 Intl-CKO		Piezo1 positive GLP-1 cells / total GLP-1 cells	Piezo1 loxp/loxp	Piezo1 Intl-CKO
#1	0.888889	0		#1	1	0		#1	1	0		#1	1	0
#2	1	0		#2	1	0		#2	1	0		#2	0.894737	0
#3	0.909091	0		#3	0.857143	0		#3	1	0		#3	1	0
#4	1	0		#4	1	0		#4	1	0		#4	1	0
#5	1	0		#5	1	0		#5	0.923077	0		#5	0.944444	0
#6	1	0		#6	1	0		#6	0.882353	0		#6	1	0
Mean	0.9663	0		Mean	0.9762	0		Mean	0.9676	0		Mean	0.9732	0
Std. Error of Mean	0.02145	0		Std. Error of Mean	0.02381	0		Std. Error of Mean	0.02117	0		Std. Error of Mean	0.01813	0
P value	Piezo1 loxp/loxp vs.Piezo1 Intl-CKO			P value	Piezo1 loxp/loxp vs.Piezo1 Intl-CKO			P value	Piezo1 loxp/loxp vs.Piezo1 Intl-CKO			P value	Piezo1 loxp/loxp vs.Piezo1 Intl-CKO
	<0.0001				<0.0001				<0.0001				<0.0001
