# Supplementary material for: Mechano-regulation of GLP-1 production by Piezo1 in intestinal L cells
Source: eLife journal article supplement (doi:10.7554/elife.97854), 2024-06-19
Supplement: fig1-figsupp7-data1 [file elife-97854-fig1-figsupp7-data1-v1.zip]

## Sheet: FigS7B
ileum
Percent of PYY positive cells (%)	Piezo1 loxp/loxp	Piezo1 Intl-CKO
#1	0.00251383	0.00323
#2	0.00115652	0.000735
#3	0.00206115	0.001872
#4	0.00173812	0.002199
#5	0.0039604	0.002293
#6	0.00234467	0.002843
Mean	0.002296	0.002195
Std. Error of Mean	0.0003866	0.0003529
P value	Piezo1 loxp/loxp vs.Piezo1 Intl-CKO
	0.8517

## Sheet: FidS7D
ileum
Percent of GLP-1 positive cells (%)	Piezo1 loxp/loxp	Piezo1 Intl-CKO
#1	0.00221361	0.000627
#2	0.00203087	0.000918
#3	0.00216607	0.000368
#4	0.00142045	0.00057
#5	0.00287632	0.000482
#6	0.00135685	0.000564
Mean	0.002011	0.0005882
Std. Error of Mean	0.0002303	7.549e-05
P value	Piezo1 loxp/loxp vs.Piezo1 Intl-CKO
	0.0002

## Sheet: FigS7E
NCD mouse ileum qpcr
CCK/β-actin mRNA levels	Piezo1 loxp/loxp	Piezo1 Intl-CKO	Vil1Flp	Gcgcre	IntL-Cre
#1	0.224262	0.902007	1.11659	0.326468	0.912428
#2	2.41892	0.78651	3.20409	3.09913	1.04502
#3	0.695864	1.14468	2.17614	0.372641	0.234592
#4	1.62555	0.352779	0.431223	0.496478	2.61459
#5	0.460469	1.34242	0.207399	0.694837	0.497995
#6	0.57494	1.08468	0.71537	0.443907	0.074856
Mean	1	0.9355	1.308	0.9056	0.8966
Std. Error of Mean	0.345	0.1408	0.4732	0.4418	0.3762
	p value
Piezo1 Intl-CKOvs. Piezo1 loxp/loxp	0.9998
Piezo1 Intl-CKO vs. Vil1Flp	0.8885
Piezo1 Intl-CKO vs. Gcgcre	>0.9999
Piezo1 Intl-CKO vs. IntL-Cre	0.9999
