# Supplementary material for: Mechano-regulation of GLP-1 production by Piezo1 in intestinal L cells
Source: eLife journal article supplement (doi:10.7554/elife.97854), 2024-06-19
Supplement: fig1-figsupp8-data1 [file elife-97854-fig1-figsupp8-data1-v1.zip]

Figure 1—figure supplement 8C

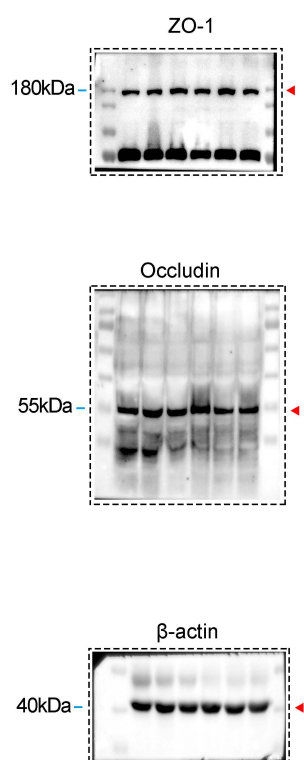

**Figure 1, Figure supplement 8, Source Data 1.** Original membranes corresponding to Figure supplement 3. 1, 2, 3 lanes were *Piezo1<sup>loxp/loxp</sup>* mice, and 4, 5, 6 lanes were *Piezo1* IntL-CKO mice.
