# Supplementary material for: Mechano-regulation of GLP-1 production by Piezo1 in intestinal L cells
Source: eLife journal article supplement (doi:10.7554/elife.97854), 2024-06-19
Supplement: fig2-data1 [file elife-97854-fig2-data1-v1.zip]

Figure 2F

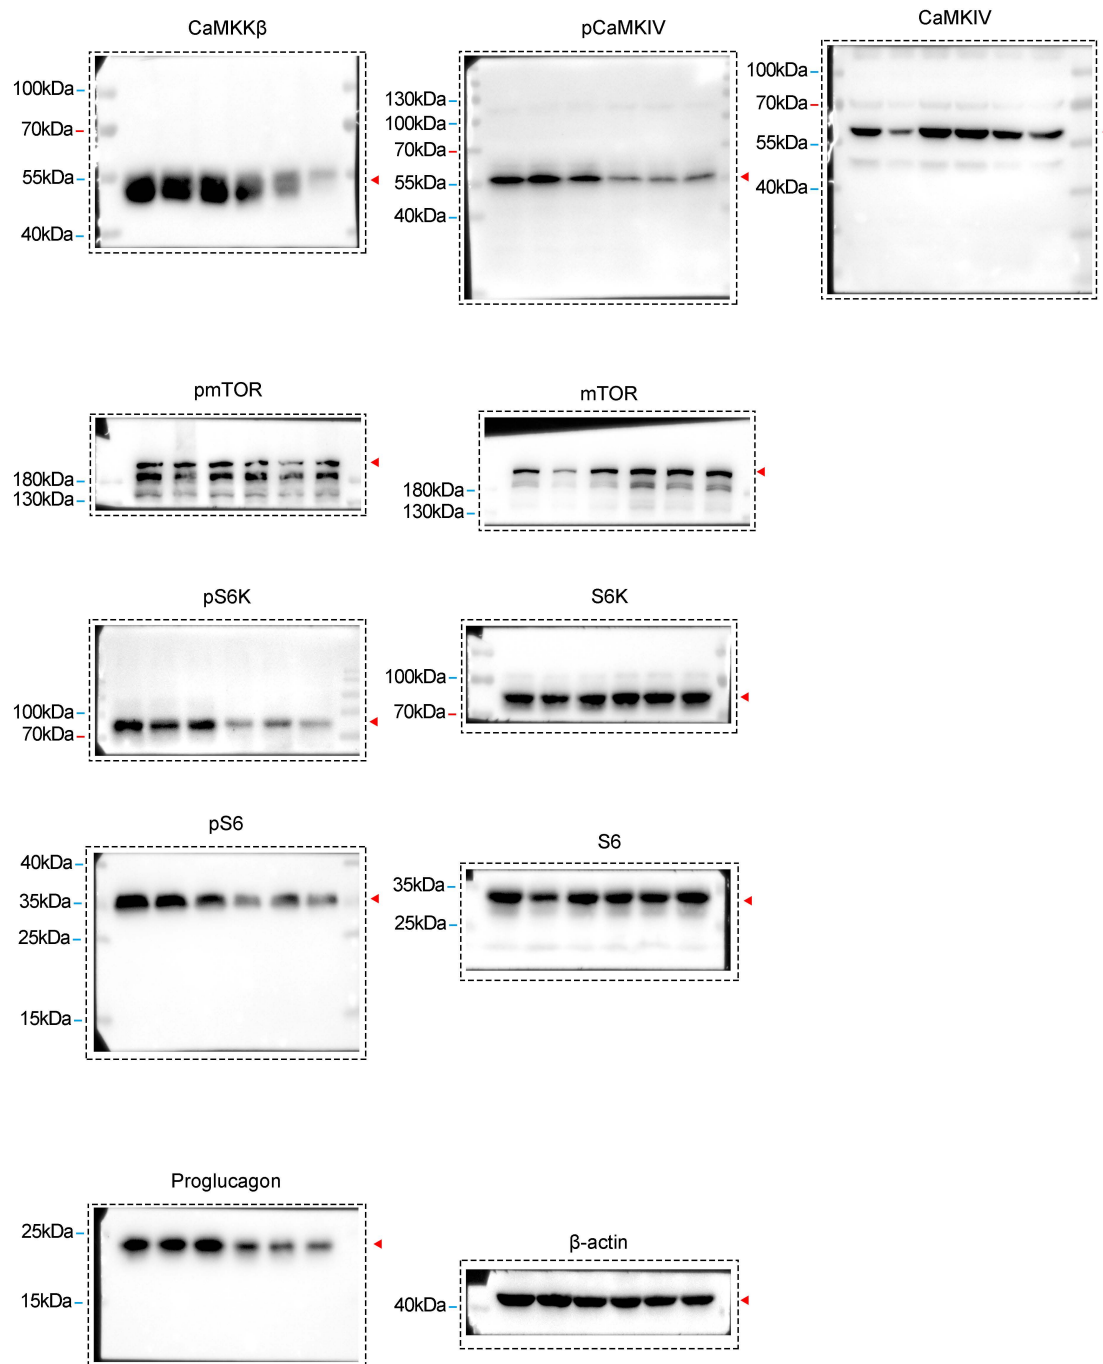

**Figure 2, Source Data 1.** Original membranes corresponding to Figure 2, panel F. Among them, 1, 2, 3 lanes are *Piezo1<sup>loxp/loxp</sup>*, and 4, 5, 6 lanes are *Piezo1* IntL-CKO.
