# Supplementary material for: Mechano-regulation of GLP-1 production by Piezo1 in intestinal L cells
Source: eLife journal article supplement (doi:10.7554/elife.97854), 2024-06-19
Supplement: fig2-data3 [file elife-97854-fig2-data3-v1.zip]

## Sheet: Fig2A
HFD
body weight(g)	Piezo1loxp/loxp	Piezo1 IntL-CKO
#1	31.5	36.9
#2	30.9	37.5
#3	32.7	37.9
#4	31.1	38.1
#5	32.1	35.4
#6	31.5	36.7
Mean	31.63	37.08
Std. Error of Mean	0.2716	0.4037
P value	Piezo1loxp/loxp VS Piezo1 IntL-CKO
	<0.0001

## Sheet: Fig2B
	HFD	Blood glucose levels (mmol/l)
IPGTT	mouse	0	15	30	60	90	120	AUC
Piezo1loxp/loxp	#1	10.2	22.9	19	9	6.7	8.8	1451
	#2	10.5	21.6	19.9	9	7	6.3	1425
	#3	9.2	25	20.6	11.4	5.7	9.2	1559
	#4	9.8	17.7	21.8	12.8	7	7.2	1532
	#5	11.5	21.4	20.5	11.8	8.5	8.6	1607
	#6	12.4	27.6	22.5	10	8.6	7.2	1679
	Mean	10.6	22.7	20.7167	10.6667	7.25	7.88333	1542
	Std. Error of Mean	0.476795	1.3813	0.517311	0.642218	0.455156	0.466488	38.88
Piezo1 IntL-CKO	#1	11.4	20.2	19.6	14.2	9.2	10	1682
	#2	12.7	24	25.7	20	13	10.4	2180
	#3	12	22	25.7	20.2	7.8	8.4	1964
	#4	13.2	28.7	24	13.9	10.1	9.7	1935
	#5	12.2	24.7	23.9	12.4	8.5	9	1762
	#6	10.8	28.6	28.6	15.9	9.7	9.6	2066
	Mean	12.05	24.7	24.5833	16.1	9.71667	9.51667	1932
	Std. Error of Mean	0.353789	1.40523	1.21475	1.34412	0.738204	0.292594	75.69
	AUC
P value	Piezo1loxp/loxp VS Piezo1 IntL-CKO
	0.001

## Sheet: Fig2C
HFD mouse ileum qpcr
proglucagon/β-actin mRNA levels	Piezo1loxp/loxp	Piezo1 IntL-CKO
#1	1.0079	0.423802
#2	0.715613	0.09546
#3	1.14718	0.417695
#4	0.944309	0.19656
#5	0.890785	0.388325
#6	1.29421	0.50029
Mean	1	0.337
Std. Error of Mean	0.0825	0.06362
P value	Piezo1loxp/loxp VS Piezo1 IntL-CKO
	<0.0001

## Sheet: Fig2D
HFD
plasma GLP-1 (pmol/l)	Piezo1loxp/loxp	Piezo1 IntL-CKO
#1	3.45506	2.58
#2	3.72334	2.45
#3	3.9648	3.09
#4	3.64286	2.79
#5	3.37457	2.4
#6	4.07211	2.99
Mean	3.705	2.717
Std. Error of Mean	0.1123	0.1168
P value	Piezo1loxp/loxp VS Piezo1 IntL-CKO
	0.0001

## Sheet: Fig2F
	HFD mouse ileum	grey value (fold change)
Piezo1loxp/loxp	Western blot	CaMKK2/b-actin	pCaMK4/CaMK4	pmTOR/mTOR	ps6k/s6k	ps6/s6	GLP-1/b-actin
	#1	1.15323	0.777103	0.743653	1.16532	1.02377	0.947608
	#2	0.685617	1.69393	1.38571	0.983373	1.26246	0.962222
	#3	1.15811	0.578196	0.711192	0.857818	0.798098	1.1273
	#4	1.20729	0.758089	0.804001	0.879291	1.11111	0.976253
	#5	0.705715	1.57649	0.788945	1.10806	1.01731	1.11096
	#6	1.09004	0.616195	1.56651	1.00614	0.787255	0.875657
	Mean	1	1	1	1	1	1
	Std. Error of Mean	0.0974669	0.203904	0.152947	0.0497022	0.0748598	0.0402966
Piezo1 IntL-CKO	#1	0.704806	0.298686	0.352734	0.375481	0.408702	0.604255
	#2	0.495656	0.313811	0.217361	0.436012	0.562209	0.530007
	#3	0.286816	0.41212	0.431241	0.390179	0.530913	0.490594
	#4	0.843171	0.300045	0.339589	0.440183	0.45378	0.542605
	#5	0.415922	0.348471	0.217013	0.361286	0.517957	0.419986
	#6	0.269587	0.410812	0.379892	0.334172	0.444304	0.411149
	Mean	0.50266	0.347324	0.322972	0.389552	0.486311	0.499766
	Std. Error of Mean	0.0940381	0.0215674	0.0358259	0.0171137	0.0242194	0.0305339
	CaMKK2/b-actin
P value	Piezo1loxp/loxp VS Piezo1 IntL-CKO
	0.0043
	pCaMK4/CaMK4
P value	Piezo1loxp/loxp VS Piezo1 IntL-CKO
	0.0098
	pmTOR/mTOR
P value	Piezo1loxp/loxp VS Piezo1 IntL-CKO
	0.0015
	ps6k/s6k
P value	Piezo1loxp/loxp VS Piezo1 IntL-CKO
	<0.0001
	ps6/s6
P value	Piezo1loxp/loxp VS Piezo1 IntL-CKO
	<0.0001
	GLP-1/b-actin
P value	Piezo1loxp/loxp VS Piezo1 IntL-CKO
	<0.0001

## Sheet: Fig2G
HFD	Piezo1loxp/loxp		Piezo1 IntL-CKO
body weight(g)	NS	Ex4	NS	Ex4
#1	30.8	27	35.8	31.7
#2	31.2	28.1	34	33.5
#3	33.1	26.9	39.4	33.1
#4	30.7	27.4	38.7	36.7
#5	31.5	29.1	35.5	35.3
#6	31.1	28.5	36.9	34.1
Mean	31.4	27.83	36.72	34.07
Std. Error of Mean	0.3596	0.3593	0.834	0.7145
P value	Piezo1loxp/loxp+NS vs. Piezo1loxp/loxp+Ex4	Piezo1loxp/loxp+NS vs.Piezo1 IntL-CKO+NS	Piezo1 IntL-CKO+NS vs.Piezo1 IntL-CKO+Ex4
	0.0025	<0.0001	0.0268

## Sheet: Fig2H
		HFD	Blood glucose levels (mmol/l)
	IPGTT	mouse	0	15	30	60	90	120	AUC
Piezo1loxp/loxp	NS	#1	10.2	27.6	20	16.6	10.9	8.5	1893
		#2	7.4	23.9	17.9	15.5	9.9	8.2	1702
		#3	7.9	27.3	28.4	13.2	9.4	7.5	1898
		#4	11.3	20.4	23.6	13.9	11.9	10	1846
		#5	8.9	13	23	9.9	8.9	8.8	1475
		#6	8.7	22.2	19.9	12.9	10.4	9	1680
		Mean	9.06667	22.4	22.1333	13.6667	10.2333	8.66667	1749
		Std. Error of Mean	0.59367	2.20378	1.52352	0.948918	0.440959	0.342215	66.93
	Ex4	#1	5.5	9.6	9.6	7.9	7.2	6.3	948.8
		#2	6	12.2	8	6.3	7.4	7.4	930
		#3	5.9	13.7	9.7	8.2	8	7.2	1062
		#4	6	8.8	8.5	7.8	8.3	8	971.3
		#5	7	13.5	10.2	10.1	9.1	8.7	1191
		#6	6.8	12.2	10	8.3	8.4	6.4	1056
		Mean	6.2	11.6667	9.33333	8.1	8.06667	7.33333	1027
		Std. Error of Mean	0.23523	0.827714	0.35932	0.497326	0.2848	0.377418	39.83
Piezo1 IntL-CKO	NS	#1	10	31.3	27.7	17.2	13.3	12	2263
		#2	8.3	27.3	26.2	16.1	12	9	2039
		#3	9.4	32.7	33.3	33.3	22	12.4	3155
		#4	7.4	30.2	32.5	32.3	13.1	8.8	2734
		#5	10.3	26.6	24	16.4	13.8	11	2087
		#6	8.1	25.6	26.2	22	13.9	11.9	2290
		Mean	8.91667	28.95	28.3167	22.8833	14.6833	10.85	2428
		Std. Error of Mean	0.471463	1.16354	1.53089	3.25734	1.48939	0.644851	176.6
	Ex4	#1	4.3	9.8	8.7	6.7	5.7	6.4	843
		#2	5.2	12.9	8.8	7.3	7.7	6.8	982.5
		#3	5.5	9	7.2	6.3	6.2	6.5	810.8
		#4	4	14.2	9	7.3	5.8	6.1	930
		#5	5.3	14.7	8.7	8.1	7.3	7.7	1034
		#6	4.4	6.9	5.1	5.7	5.5	4.8	659.3
		Mean	4.78333	11.25	7.91667	6.9	6.36667	6.38333	876.6
		Std. Error of Mean	0.254842	1.28342	0.622584	0.34641	0.373869	0.387657	55.23
	AUC
P value	Piezo1loxp/loxp+NS vs. Piezo1loxp/loxp+Ex4	Piezo1loxp/loxp+NS vs.Piezo1 IntL-CKO+NS	Piezo1 IntL-CKO+NS vs.Piezo1 IntL-CKO+Ex4
	0.0003	0.0006	<0.0001

## Sheet: Fig2I
		HFD	Blood glucose levels (mmol/l)
	ITT	mouse	0	15	30	60	90	120	AUC
Piezo1loxp/loxp	NS	#1	8.3	7.8	7	6.5	8.7	8.7	923.3
		#2	9.5	5.6	6.4	5.7	6.5	8.3	789.8
		#3	7.6	6.8	5.3	5.4	6.6	7	743.3
		#4	7.6	8.8	6.7	7.1	6.8	7	861.8
		#5	9.2	9.5	8.6	7.6	8.4	6.9	988.5
		#6	8.9	8.5	7.2	8.2	6.5	9.4	938.3
		Mean	8.51667	7.83333	6.86667	6.75	7.25	7.88333	874.2
		Std. Error of Mean	0.332081	0.583476	0.440959	0.444785	0.415331	0.434677	38.3
	Ex4	#1	6.7	5	5.3	5	6.7	8	715.5
		#2	5.7	5.4	4.5	5.2	4.8	6.7	625.5
		#3	6.6	6.5	5.3	6.2	6.7	7.4	764.3
		#4	6.6	6.7	5	5.5	6.6	7.4	736.5
		#5	6.8	5.4	4.9	5.2	6.8	6.4	698.3
		#6	6.9	4.8	5	6.1	6	7.5	711.8
		Mean	6.55	5.63333	5.35	6	6.26667	7.23333	708.7
		Std. Error of Mean	0.176541	0.321109	0.268017	0.304412	0.315876	0.23758	19.11
Piezo1 IntL-CKO	NS	#1	10.9	9.6	8	8.6	9	11.4	1105
		#2	10.1	7.6	8.6	9.1	9.7	10.7	1108
		#3	9.7	12.9	7.4	6.6	6.5	8.2	948.8
		#4	11.4	9.8	7.8	6.9	6.3	6.5	901.5
		#5	10.8	10.6	6.8	8.2	7.8	10.3	1028
		#6	11.1	6.8	6	8.6	8	11.4	989.3
		Mean	10.6667	9.55	7.43333	8	7.88333	9.75	1013
		Std. Error of Mean	0.261619	0.88985	0.377418	0.413924	0.547367	0.8086	34.07
	Ex4	#1	5.6	4.6	3.9	3.8	3.4	3.8	471.8
		#2	5.9	5.5	5	6.3	6.4	7	725.3
		#3	5.7	4.7	4	4.2	3.9	4.7	516.8
		#4	5.1	3	2.5	3.2	4.2	5	436.5
		#5	5.9	4.3	4.3	5.3	4.6	6	592.5
		#6	5.6	3.3	2.8	3.4	4.9	4.9	477
		Mean	5.63333	4.23333	3.75	4.36667	4.56667	5.23333	536.7
		Std. Error of Mean	0.120185	0.380935	0.383623	0.491709	0.424788	0.455095	43.55
	AUC
P value	Piezo1loxp/loxp+NS vs. Piezo1loxp/loxp+Ex4	Piezo1loxp/loxp+NS vs.Piezo1 IntL-CKO+NS	Piezo1 IntL-CKO+NS vs.Piezo1 IntL-CKO+Ex4
	0.0156	0.0482	<0.0001

## Sheet: Fig2J
HFD mouse ileum qpcr	Piezo1loxp/loxp		Piezo1 IntL-CKO
Gcg/β-actin mRNA levels	NS	Ex4	NS	Ex4
#1	1.12784	0.411369	0.198979	0.281225
#2	1.20882	0.0343915	0.702296	0.080328
#3	0.394557	0.236171	0.0806263	0.377059
#4	0.369476	0.15978	0.104535	0.350076
#5	1.34877	0.0502342	0.0978422	0.683985
#6	1.55295	0.0605935	0.245703	0.52437
Mean	1	0.1588	0.2383	0.3828
Std. Error of Mean	0.2042	0.05963	0.0965	0.08439
P value	Piezo1loxp/loxp+NS vs.Piezo1 IntL-CKO+NS
	0.0017

## Sheet: Fig2K
HFD	Piezo1loxp/loxp		Piezo1 IntL-CKO
plasma GLP-1 (pmol/l)	NS	Ex4	NS	Ex4
#1	2.86	2.47	2.52	2.34
#2	3.17	2.38	2.64	2.41
#3	2.85	2.29	2.55	2.43
#4	2.82	2.32	2.77	2.35
#5	3.04	2.72	2.5	2.22
#6	3.12	2.67	2.98	2.57
Mean	2.977	2.475	2.66	2.387
Std. Error of Mean	0.06222	0.07424	0.07576	0.04738
P value	Piezo1loxp/loxp+NS vs.Piezo1 IntL-CKO+NS
	0.0139
