# Supplementary material for: Mechano-regulation of GLP-1 production by Piezo1 in intestinal L cells
Source: eLife journal article supplement (doi:10.7554/elife.97854), 2024-06-19
Supplement: fig2-figsupp1-data1 [file elife-97854-fig2-figsupp1-data1-v1.zip]

Figure 2-figure supplement 9C

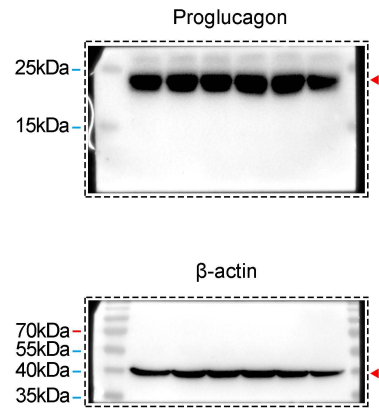

**Figure 2, Figure supplement 9, Source Data 1.** Original membranes corresponding to Figure supplement 3. On high-fat diet feeding, 1, 2, 3 lanes were *Piezo1*<sup>loxp/loxp</sup> mice, and 4, 5, 6 lanes were *Piezo1* IntL-CKO mice.
