# Supplementary material for: Mechano-regulation of GLP-1 production by Piezo1 in intestinal L cells
Source: eLife journal article supplement (doi:10.7554/elife.97854), 2024-06-19
Supplement: fig2-figsupp1-data3 [file elife-97854-fig2-figsupp1-data3-v1.zip]

## Sheet: Figure2-FigS1B
HFD mouse pancreas qpcr
Piezo1/β-actin mRNA levels	Piezo1 loxp/loxp	Piezo1 Intl-CKO
#1	0.497765	2.81894
#2	1.8926	0.014575
#3	1.28374	1.65204
#4	1.12273	1.35861
#5	1.18977	0.479891
#6	0.013391	0.085397
Mean	1	1.068
Std. Error of Mean	0.268	0.4439
p value	Piezo1 Intl-CKOvs. Piezo1 loxp/loxp
	0.8979

## Sheet: Figure2-FigS1C
HFD mouse pancreas qpcr
Gcg/β-actin mRNA levels	Piezo1 loxp/loxp	Piezo1 Intl-CKO
#1	1.81399	0.002101
#2	1.08641	0.067848
#3	2.30562	3.93872
#4	0.001492	0.545169
#5	0.751342	0.097297
#6	0.041151	0.03049
Mean	1	0.7803
Std. Error of Mean	0.3809	0.637
p value	Piezo1 Intl-CKO vs. Piezo1 loxp/loxp
	0.7732

## Sheet: Figure2-FigS1D
	mouse pancreas	grey value (fold change)
Piezo1 loxp/loxp	Western blot	Gcg/b-actin
	#1	0.998014
	#2	1.07673
	#3	0.912632
	#4	1.0232
	#5	1.06691
	#6	0.922518
	Mean	1
	Std. Error of Mean	0.0286
Piezo1 Intl-CKO	#1	0.974149
	#2	0.997328
	#3	0.949228
	#4	1.03356
	#5	1.08796
	#6	0.845904
	Mean	0.9814
	Std. Error of Mean	0.03355
	Gcg/b-actin
p value	Piezo1 loxp/loxp vs. Piezo1 Intl-CKO
	0.6813
