# Supplementary material for: Mechano-regulation of GLP-1 production by Piezo1 in intestinal L cells
Source: eLife journal article supplement (doi:10.7554/elife.97854), 2024-06-19
Supplement: fig3-data3 [file elife-97854-fig3-data3-v1.zip]

## Sheet: Fig3A 
HFD	C57BL/6J
body weight(g)	WT	Yoda1	Yoda1+GsMtx4
#1	30.5	26.4	31.2
#2	30.5	27.4	30.4
#3	31.5	26.3	29.1
#4	32.4	25.9	28.1
#5	29.8	29.1	32.6
#6	30.2	28.6	30.7
Mean	30.82	27.28	30.35
Std. Error of Mean	0.3911	0.5388	0.6464
P value	WT vs. Yoda1	Yoda1+GsMtx4 vs. Yoda1
	0.0008	0.0028

## Sheet: Fig3B
	HFD	Blood glucose levels (mmol/l)
IPGTT	C57BL/6J mouse	0	15	30	60	90	120	AUC
Control	#1	7	28.1	24.5	15.9	13.3	11.7	2077
	#2	9.8	25	21.3	14	13.2	11.7	1919
	#3	10.2	23	24.7	16.3	11.2	12.1	1984
	#4	10	24	23.1	13.4	10.5	12.2	1855
	#5	11.9	16.3	24.3	18.3	15	14.2	2093
	#6	11.1	19.6	26.4	20.8	15.8	16.4	2315
	Mean	10	22.6667	24.05	16.45	13.1667	13.05	2041
	Std. Error of Mean	0.680686	1.70091	0.699405	1.12509	0.842483	0.770606	66.28
Yoda1	#1	5	18.6	16.9	9.7	9	7.1	1364
	#2	7.3	25.2	18.5	15	11	12	1809
	#3	9.2	15.2	23.6	14.2	11	9	1719
	#4	9.8	22.1	20.3	14.3	11.5	9.7	1781
	#5	9.5	18.5	20.3	13.3	12	10.5	1722
	#6	6.6	17	21	17	13	10.2	1830
	Mean	7.9	19.4333	20.1	13.9167	11.25	9.75	1704
	Std. Error of Mean	0.781452	1.48069	0.929875	0.98435	0.543906	0.668705	70.47
Yoda1+GsMtx4	#1	7.4	27.3	24.8	15	14.8	12.8	2109
	#2	9.2	31.9	24.9	17.8	15.1	13	2290
	#3	9.1	23.6	24.4	18.8	18.5	13	2285
	#4	8.7	22.8	22.9	12.6	11.3	9.2	1778
	#5	12.5	24.1	23.3	16.4	13.9	12.5	2076
	#6	9	28.4	32.1	21.2	15.4	12.5	2501
	Mean	9.31667	26.35	25.4	16.9667	14.8333	12.1667	2173
	Std. Error of Mean	0.691576	1.42753	1.38034	1.22792	0.952074	0.60037	100.6
	AUC
P value	WT vs. Yoda1	Yoda1+GsMtx4 vs. Yoda1
	0.0253	0.0025

## Sheet: Fig3C
HFD mouse ileum qpcr	C57BL/6J
Gcg/β-actin mRNA levels	Control	Yoda1	Yoda1+GsMtx4
#1	1.4	2.8	0.08
#2	0.77	2.83	0.22
#3	0.83	1.26	0.102432
#4	1.34196	1.65	0.12166
#5	0.873019	1.1	0.729589
#6	0.783464	1.85821	0.548898
Mean	1	1.916	0.3004
Std. Error of Mean	0.1186	0.3048	0.1114
P value	WT vs. Yoda1	Yoda1+GsMtx4 vs. Yoda1
	0.014	0.0001

## Sheet: Fig3D
HFD	C57BL/6J
plasma GLP-1 (pmol/l)	Control	Yoda1	Yoda1+GsMtx4
#1	2.60275	4.17116	3.3
#2	3.01549	3.81	3.22
#3	2.1625	4.03358	3.12556
#4	3.2081	4.37	3.67
#5	2.74033	4.28123	2.41
#6	2.49269	3.86849	3.5383
Mean	2.704	4.089	3.211
Std. Error of Mean	0.1528	0.09169	0.1803
P value	WT vs. Yoda1	Yoda1+GsMtx4 vs. Yoda1
	<0.0001	0.0019

## Sheet: Fig3E 
	HFD C57BL/6J mouse ileum	grey value (fold change)
Control	Western blot	CaMKK2/b-actin	pCaMK4/CaMK4	pmTOR/mTOR	ps6k/s6k	ps6/s6	GLP-1/b-actin
	#1	1.07542	1.12102	1.18506	1.05433	0.870386	0.609047
	#2	1.0341	1.01666	0.903295	1.15848	1.15121	1.50423
	#3	0.944414	1.2462	1.11245	1.12458	0.753903	0.692261
	#4	0.793609	1.27164	0.843536	1.00714	1.29184	1.32952
	#5	1.00044	0.456315	1.23867	0.864899	1.16259	0.457815
	#6	1.15202	0.888164	0.716988	0.790567	0.770073	1.40713
	Mean	1	1	1	1	1	1
	Std. Error of Mean	0.0502155	0.123481	0.0852026	0.0593727	0.0939325	0.188865
Yoda1	#1	1.98239	4.14143	2.31888	4.46892	4.85769	4.36667
	#2	2.03285	4.72895	1.42996	4.13021	3.58709	3.7318
	#3	2.10691	3.82001	2.26263	4.75065	3.43211	3.66625
	#4	1.95227	3.8504	1.66142	4.66322	3.41698	3.45611
	#5	1.40484	4.15867	1.98417	3.62303	3.31807	3.37546
	#6	1.50099	5.27697	1.61275	3.27878	3.21121	3.43774
	Mean	1.83004	4.3294	1.8783	4.15247	3.63719	3.67234
	Std. Error of Mean	0.121794	0.231727	0.149621	0.242415	0.249398	0.150067
Yoda1+GsMtx4	#1	0.836076	2.33302	0.573892	1.07845	1.12944	1.59543
	#2	0.747346	2.77224	0.666628	0.646181	0.99013	1.03047
	#3	0.815093	2.37636	0.682711	0.970816	1.05211	1.88037
	#4	0.582438	2.62258	0.661782	0.867763	0.832733	1.0776
	#5	0.832581	2.0627	0.647443	1.03947	1.16295	1.52451
	#6	0.72063	1.69407	0.599136	0.868463	1.06414	1.15046
	Mean	0.755694	2.31016	0.638599	0.911858	1.03858	1.37647
	Std. Error of Mean	0.0396728	0.158832	0.0174083	0.0637512	0.0480557	0.13951
	CaMKK2/b-actin
P value	WT vs. Yoda1	Yoda1+GsMtx4 vs. Yoda1
	<0.0001	<0.0001
	pCaMK4/CaMK4
P value	WT vs. Yoda1	Yoda1+GsMtx4 vs. Yoda1
	<0.0001	<0.0001
	pmTOR/mTOR
P value	WT vs. Yoda1	Yoda1+GsMtx4 vs. Yoda1
	<0.0001	<0.0001
	ps6k/s6k
P value	WT vs. Yoda1	Yoda1+GsMtx4 vs. Yoda1
	<0.0001	<0.0001
	ps6/s6
P value	WT vs. Yoda1	Yoda1+GsMtx4 vs. Yoda1
	<0.0001	<0.0001
	GLP-1/b-actin
P value	WT vs. Yoda1	Yoda1+GsMtx4 vs. Yoda1
	<0.0001	<0.0001

## Sheet: Fig3F
HFD	Piezo1 IntL-CKO
body weight(g)	Control	Yoda1
#1	35.7	33.9
#2	37.5	35.9
#3	35.5	35.9
#4	36.1	34.1
#5		35.7
#6
Mean	36.2	35.1
Std. Error of Mean	0.4509	0.4517
P value	Control vs. Yoda1
	0.1331

## Sheet: Fig3G
HFD	Piezo1 IntL-CKO
Fasting blood glucose levels (mmol/l)	Control	Yoda1
#1	13.6	11
#2	10.8	13.2
#3	13.4	11.2
#4	11	10.8
#5		11
#6
Mean	12.2	11.44
Std. Error of Mean	0.752773	0.444522
P value	Control vs. Yoda1
	0.391

## Sheet: Fig3H
HFD mouse ileum qpcr	Piezo1 IntL-CKO
Gcg/β-actin mRNA levels	Control	Yoda1
#1	0.586868	1.36
#2	1.21239	1.03987
#3	0.821672	0.740515
#4	1.37907	0.802493
#5		1.13476
Mean	1	1.016
Std. Error of Mean	0.1806	0.1128
P value	Control vs. Yoda1
	0.9414

## Sheet: Fig3I
HFD mouse ileum qpcr	Piezo1 IntL-CKO
plasma GLP-1 (pmol/l)	Control	Yoda1
#1	2.68979	2.08229
#2	2.00635	2.21897
#3	2.29491	2.73536
#4	2.50754	2.03672
#5		2.44679
Mean	2.375	2.304
Std. Error of Mean	0.1469	0.1293
P value	Control vs. Yoda1
	0.7283

## Sheet: Fig3J
	HFD Piezo1 IntL-CKO mouse ileum	grey value (fold change)
Control	Western blot
	#1	1.11187
	#2	1.02405
	#3	0.943252
	#4	0.920831
	Mean	1
	Std. Error of Mean	0.04338
Yoda1	#1	0.992666
	#2	1.1226
	#3	1.04269
	#4	1.03804
	#5	1.05064
	Mean	1.049
	Std. Error of Mean	0.02092
P value	Control vs. Yoda1
	0.3081

[truncated: 9 more sheets: Fig3K, Fig3L, Fig3M, Fig3N, Fig3O, Fig3P, Fig3Q, Fig3R, Sheet11]
