# Supplementary material for: Mechano-regulation of GLP-1 production by Piezo1 in intestinal L cells
Source: eLife journal article supplement (doi:10.7554/elife.97854), 2024-06-19
Supplement: fig3-figsupp1-data1 [file elife-97854-fig3-figsupp1-data1-v1.zip]

## Sheet: Figure3-FigS1A
	HFD mouse
	Fecal weight (g)	sham	bead
	#1	0.8892	0.8963
	#2	0.8892	0.848
	#3	0.6791	0.8575
	#4	0.8705	0.6285
	#5	0.6856	0.6666
	#6	0.7465	0.854
	#7	0.8739	0.8869
	#8	0.7623	0.4609
	#9	0.7395	0.7515
	Mean	0.7929	0.7611
	Std. Error of Mean	0.02923	0.04948
	P value	sham vs.bead
		0.5885

## Sheet: Figure3-FigS1B
HFD mouse
Gastrointestinal transit time （min）	sham	bead
#1	180	185
#2	190	180
#3	170	190
#4	175	195
#5	185	200
Mean	180	190
Std. Error of Mean	3.536	3.536
P value	sham vs.bead
	0.0805

## Sheet: Figure3-FigS1C
HFD mouse					HFD mouse					HFD mouse
Number of withdrawals VFF0.07g	sham	bead			Number of withdrawals VFF0.07g	sham	bead			Number of withdrawals VFF0.07g	sham	bead
#1	3	0			#1	3	5			#1	8	7
#2	2	4			#2	4	5			#2	9	10
#3	6	7			#3	7	7			#3	10	9
#4	1	2			#4	4	5			#4	8	6
#5	4	3			#5	5	2			#5	10	6
Mean	3.2	3.2			Mean	4.6	4.8			Mean	9	7.6
Std. Error of Mean	1.92354	2.58844			Std. Error of Mean	1.51658	1.78885			Std. Error of Mean	0.447214	0.812404
P value	sham vs.bead				P value	sham vs.bead				P value	sham vs.bead
	>0.999999					0.853517					0.16957
