# Supplementary material for: Mechano-regulation of GLP-1 production by Piezo1 in intestinal L cells
Source: eLife journal article supplement (doi:10.7554/elife.97854), 2024-06-19
Supplement: fig4-data1 [file elife-97854-fig4-data1-v1.zip]

Figure 4F

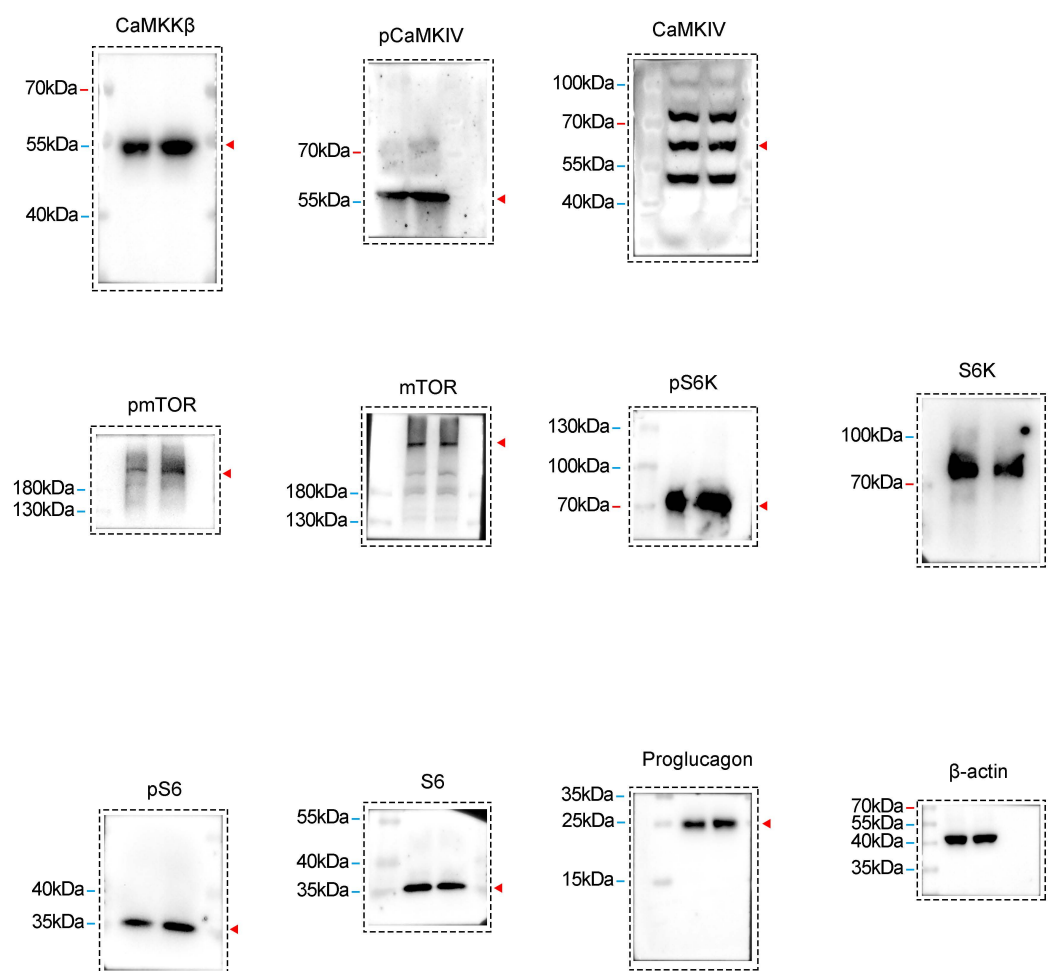

**Figure 4, Source Data 1.** The original membranes corresponding to Figure 4, panel F, are presented here. In the first lane, primary L cells were treated with DMSO, while the second lane features primary L cells treated with Yoda1.

Figure 4J

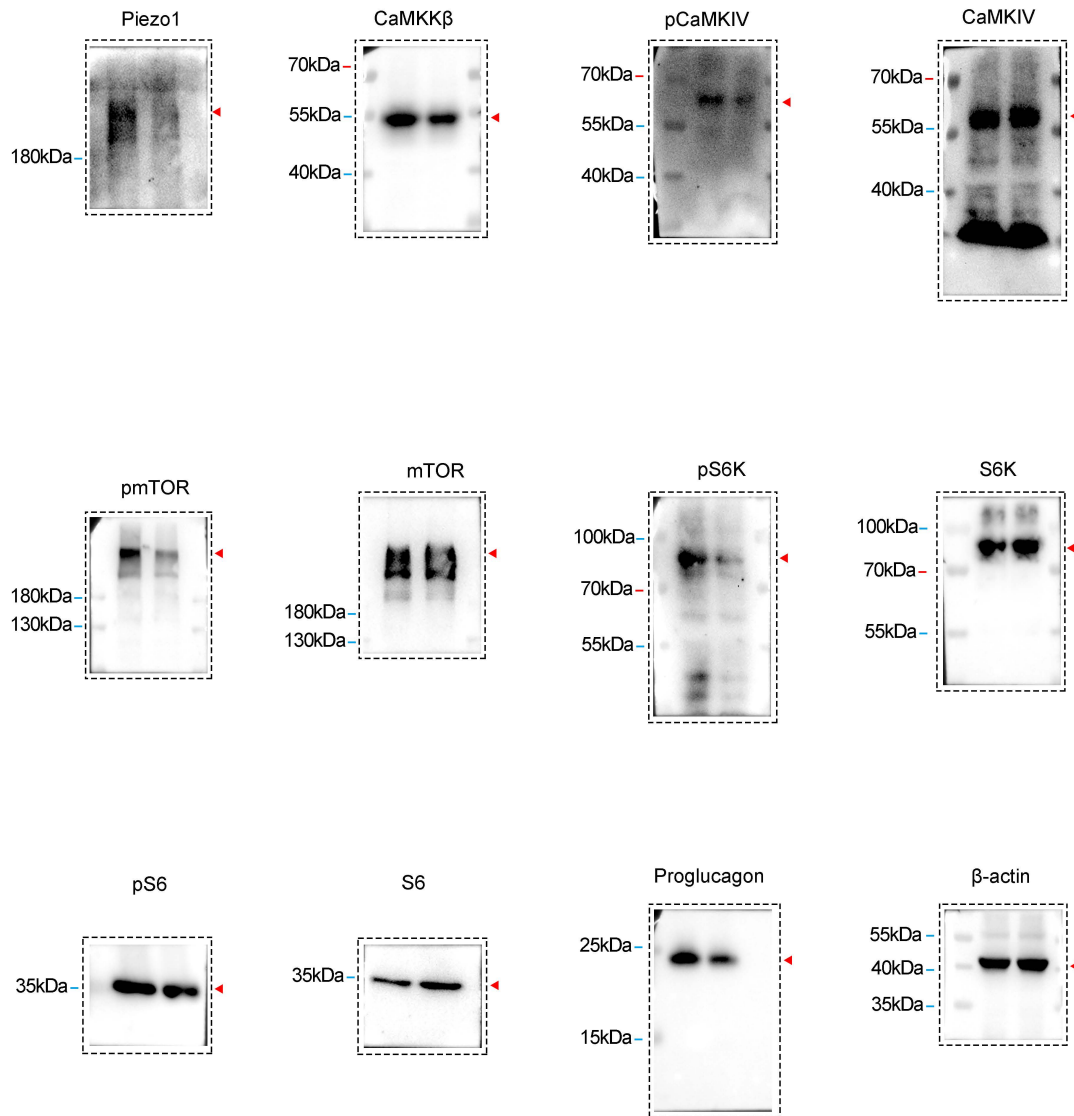

**Figure 4, Source Data 1.** Original membranes corresponding to Figure 4, panel J. The first lane represents control treatment, while the second lane features primary L cells treated with *sh-Piezo1*.

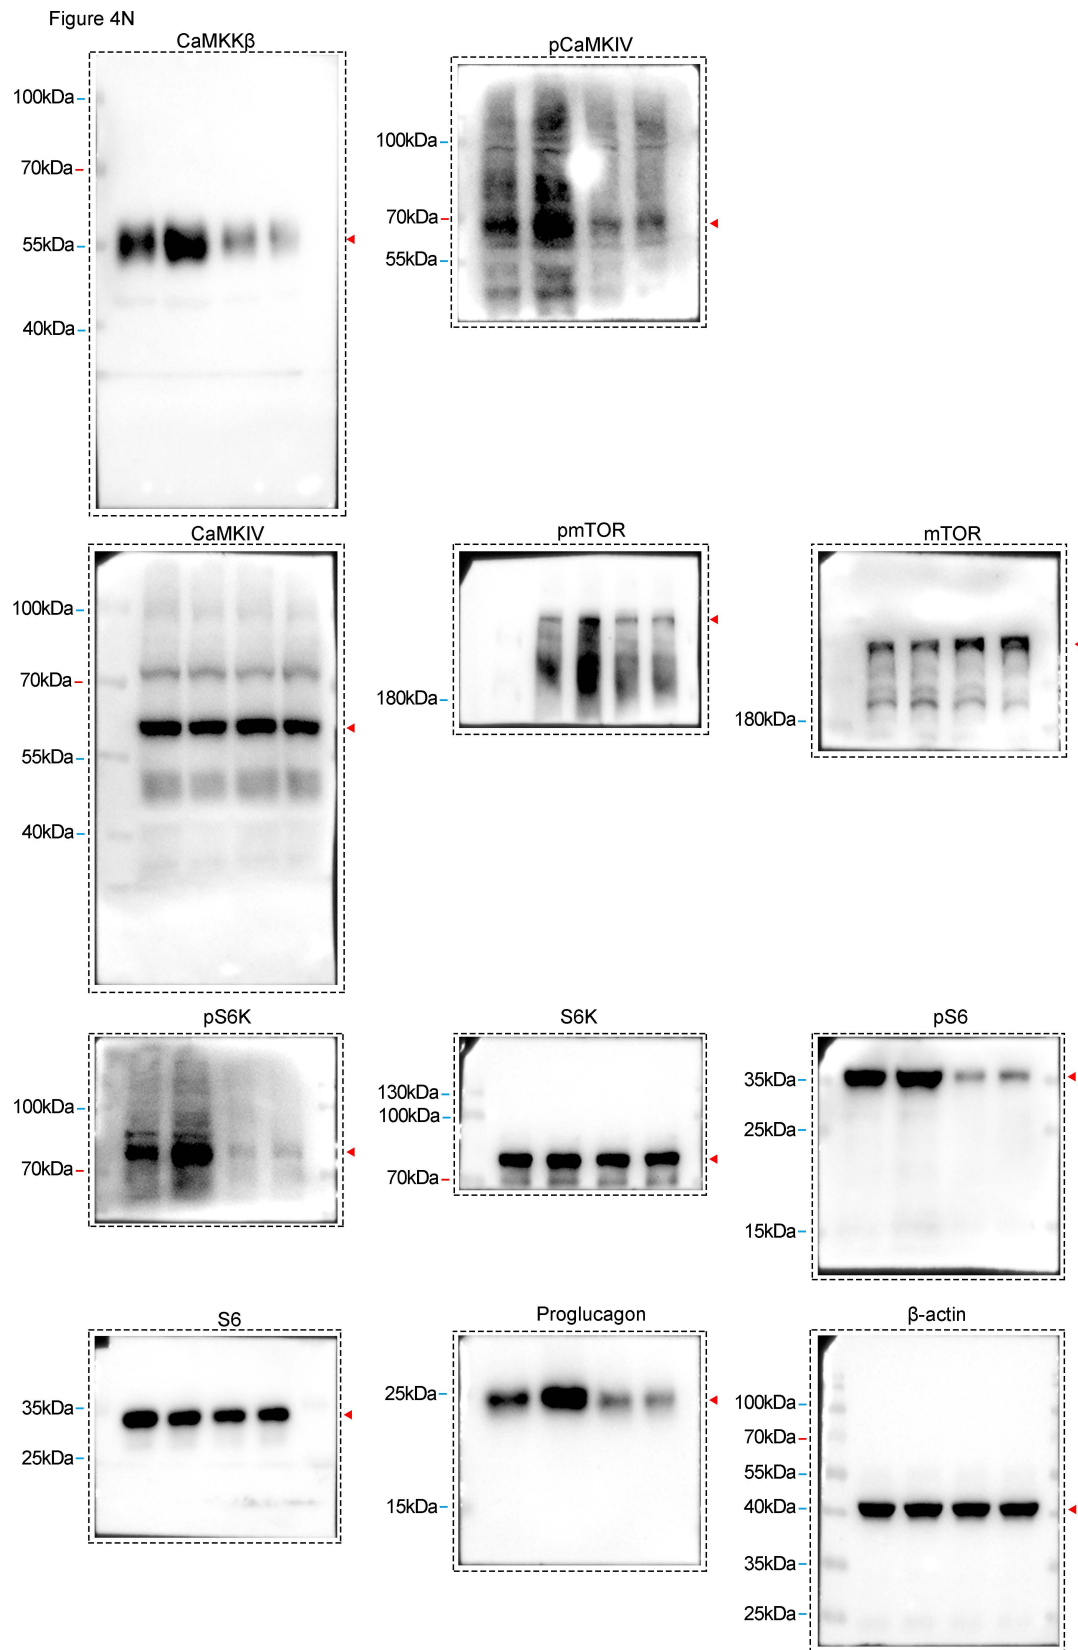

**Figure 4, Source Data 1.** Original membranes corresponding to Figure 4, panel N. The first lane represents the unstretched ileum of *Piezo1*<sup>loxP/loxP</sup> mice, the second lane shows the stretch-treated ileum of *Piezo1*<sup>loxP/loxP</sup> mice, the third lane depicts the unstretched ileum of *Piezo1* IntL-CKO mice, and the fourth lane illustrates the stretch-treated ileum of *Piezo1* IntL-CKO mice.
