# Supplementary material for: Mechano-regulation of GLP-1 production by Piezo1 in intestinal L cells
Source: eLife journal article supplement (doi:10.7554/elife.97854), 2024-06-19
Supplement: fig4-data3 [file elife-97854-fig4-data3-v1.zip]

## Sheet: Fig4C
t/s	DMSO			Yoda1			Yoda1+GsMTx4
0	1	1	1	1	1	1	1.08079	1	1
10	1.00716	0.995537	1.01136	1.03434	1.00513	1.04194	1.11249	0.999043	0.997057
20	1.00771	1.00066	0.997254	1.00027	1.00757	1.06756	1.07474	1.00275	0.99687
30	1.03338	1.01063	1.00424	1.00635	1.00104	1.08128	1	1.00181	0.997596
40	1.01912	1.00388	1.00178	1.07303	1.00147	1.0672	1.01361	1.00259	0.992497
50	1.02655	1.00363	1.00372	1.01917	1.00371	1.07046	1.00382	1.00525	0.99542
60	1.02557	1.01438	1.00617	1.44888	1.42577	1.51328	1.00243	0.995419	0.994611
70	1.02047	0.988999	1.01054	1.31821	1.56621	1.55315	1.00666	0.995602	0.996
80	1.02519	0.972642	1.00997	1.45191	1.6631	1.50332	1.0053	1.00368	1.00073
90	1.02372	0.988067	1.01171	1.49425	1.3271	1.78737	1.0174	0.996824	1.00222
100	1.01473	0.986651	1.00839	1.62855	1.7271	1.61627	1.01627	0.994034	0.989388
110.001	1.01976	0.973593	1.00709	1.62553	1.91999	1.64285	1.01505	1.03347	1.00462
120.001	1.02581	0.9753	1.00225	1.63279	1.88444	1.90033	1.0262	1.10178	0.999544
130.001	1.02951	0.987582	1.00625	1.77253	1.88621	1.86046	1.07231	1.0756	0.997762
140.001	1.01976	0.976658	1.01144	1.72716	2.00621	1.77574	1.05859	1.02641	1.00342
150.001	1.02396	0.984594	1.00825	1.92498	2.09154	1.86378	1.07028	1.04968	1.00224
160.001	1.01905	1.01284	1.01094	2.05021	1.98843	1.99335	1.08658	1.07857	0.997948
170.001	1.02569	1.02542	1.01648	1.93224	2.25154	2.20431	1.09188	1.10591	0.994052
180.001	1.03034	0.98149	1.00862	1.90623	2.27199	2.35547	1.09338	1.08914	1.0024
190.001	1.02716	0.981296	1.0047	2.32184	2.26132	2.39534	1.10644	1.09647	1.00589
200.001	1.01846	1.01989	1.01275	2.1954	2.38488	2.26743	1.08956	1.08574	1.00238
210.001	1.03333	1.02649	1.0026	2.18935	2.71021	3.00664	1.05442	1.03221	1.00703
220.001	1.02996	1.03576	1.01312	2.31155	2.44977	2.38039	1.09312	1.00719	1.01047
230.001	1.02517	1.05629	1.00927	2.35632	2.76799	2.55149	1.10068	1.01248	1.01215
240.001	1.03195	1.09519	1.0109	2.42408	2.79465	2.69933	1.09851	0.994442	1.00595
250.001	1.02121	1.0728	1.016	2.38052	2.73065	2.78072	1.09567	1.00497	1.00642
260.001	1.03286	1.06246	1.01186	2.57471	2.88799	3.10962	1.09882	1.00527	1.00653
270.001	1.00427	1.10101	1.00692	2.42408	2.72354	2.84052	1.09781	1.00263	1.01393
280.001	1.03613	1.05798	1.00867	2.50756	2.59732	2.73919	1.09495	1.0054	1.01024
290.001	1.02738	1.10004	1.01733	2.48155	2.84976	2.98006	1.08079	0.999308	0.994383
300.001	1.02489	1.09987	1.00778	2.4507	3.04265	2.90863	1.11249	1.00228	1.00087
310.001	1.03686	1.08582	1.0122	2.49123	2.98932	3.27906	1.07474	0.996091	0.998674
320.001	1.02835	1.09942	1.00959	2.50393	3.24176	3.19102	1.09008	0.995663	0.993264
330.001	1.03516	1.08822	1.00016	2.56503	3.07732	3.15281	1.0884	0.998677	0.985429
340.001	1.01397	1.10532	1.00858	2.56685	3.0471	3.16278	1.08111	1.00232	1.00305
350.001	1.03048	1.06894	1.00895	2.77858	3.06132	3.02989	1.01786	1.01617	1.00512
360.001	1.02697	1.08332	1.01052	2.63339	3.07821	2.88537	1.03948	1.01661	1.00012
370.001	1.0242	1.10697	1.01613	2.76588	3.01865	3.00996	1.02814	1.01124	1.00332
380.001	1.02529	1.09946	1.01293	2.69933	3.06665	2.78072	1.01167	1.01435	1.00294
390.001	1.01096	1.10763	1.01745	2.58197	2.96443	3.21594	1.01083	1.01264	0.995544
400.001	0.987735	1.09139	1.00929	2.74229	3.34487	3.38039	1.06947	1.00709	1.01009
410.001	1.02192	1.08058	1.02218	2.95281	3.12354	3.20099	1.03031	1.01185	1.00902
420.001	0.98579	1.0272	1.01327	2.73261	3.10843	3.3372	1.1091	1.01492	0.999834
430.001	0.99554	1.01415	1.01654	2.90744	3.24709	3.2475	1.09758	1.01427	1.00833
440.001	1.0176	1.03586	1.01263	2.77677	3.27554	2.93188	1.10241	1.00377	1.01374
450.001	1.02517	1.07546	1.01335	2.81004	3.24265	3.15115	1.08146	1.0114	1.01128
460.001	1.03423	1.04494	1.02141	2.99758	3.23465	2.92026	1.02987	1.00401	1.01364
470.001	1.03233	1.02604	1.00727	2.81307	3.40976	3.58803	1.04417	1.00434	1.009
480.001	1.03793	1.02695	1.01204	2.87538	3.12532	3.41361	1.08377	1.00959	0.998259

## Sheet: Fig4D
L cells qpcr
Gcg/β-actin mRNA levels	DMSO	Yoda1
#1	2.39232	4.90803
#2	2.71245	7.00707
#3	0.070592	2.37522
#4	0.003549	1.27515
#5	0.115668	6.92889
#6	0.705424	5.31158
Mean	1	4.634
Std. Error of Mean	0.5032	0.9629
P value	DMSO vs. Yoda1
	0.0074

## Sheet: Fig4E
L cells qpcr
Medium GLP-1 concentration (fold change)	DMSO	Yoda1
#1	1.00523	1.8654
#2	0.936167	1.94703
#3	1.09313	2.09771
#4	1.05546	1.83401
#5	0.892217	1.76495
#6	1.01779	1.92819
Mean	1	1.906
Std. Error of Mean	0.03043	0.04678
P value	DMSO vs. Yoda1
	<0.0001

## Sheet: Fig4F
	L cells	grey value (fold change)
DMSO	Western blot	CaMKK2/b-actin	pCaMK4/CaMK4	pmTOR/mTOR	ps6k/s6k	ps6/s6	GLP-1/b-actin
	#1	1.49219	1.04519	0.894792	0.855067	0.992818	1.44996
	#2	1.2238	0.968589	1.24118	0.556143	1.23481	0.653937
	#3	1.06831	1.06197	0.800701	1.00327	0.846239	0.919053
	#4	0.68994	1.03365	1.0509	1.17495	0.914653	1.1432
	#5	0.338948	0.922872	0.893296	1.64759	0.968328	1.08142
	#6	1.18681	0.967731	1.11913	0.76298	1.04315	0.752423
	Mean	1	1	1	1	1	1
	Std. Error of Mean	0.169807	0.0223541	0.067608	0.155369	0.0544613	0.117928
Yoda1	#1	3.10188	2.23421	2.14339	3.43547	2.23811	2.72584
	#2	3.25147	2.43059	2.4448	3.02287	2.5304	2.6553
	#3	3.15302	2.37215	3.3776	4.50018	2.3759	2.61056
	#4	3.28975	2.19116	4.23705	3.69626	1.91838	2.55011
	#5	2.91726	2.81575	3.79905	3.06374	2.08154	2.53146
	#6	3.15966	2.79124	3.56344	3.95797	2.02524	2.63764
	Mean	3.1455	2.47251	3.26089	3.61275	2.19493	2.61848
	Std. Error of Mean	0.053631	0.110631	0.329772	0.230541	0.0940365	0.0291883
	CaMKK2/b-actin
P value	DMSO vs. Yoda1
	<0.0001
	pCaMK4/CaMK4
P value	DMSO vs. Yoda1
	<0.0001
	pmTOR/mTOR
P value	DMSO vs. Yoda1
	<0.0001
	ps6k/s6k
P value	DMSO vs. Yoda1
	<0.0001
	ps6/s6
P value	DMSO vs. Yoda1
	<0.0001
	GLP-1/b-actin
P value	DMSO vs. Yoda1
	<0.0001

## Sheet: Fig4G
L cells qpcr
Piezo1/β-actin mRNA levels	control	sh-Piezo1
#1	0.860282	0.541659
#2	1.0516	0.180273
#3	1.08812	0.639979
#4	1.04682	0.342157
#5	0.879237	0.687482
#6	1.07394	0.696234
Mean	1	0.5146
Std. Error of Mean	0.04171	0.0858
P value	control vs. sh-Piezo1
	0.0005

## Sheet: Fig4H
L cells qpcr
Gcg/β-actin mRNA levels	control	sh-Piezo1
#1	2.06522	0.24076
#2	0.0573467	0.118977
#3	0.877434	0.0242512
#4	0.316266	0.00729324
#5	2.30255	0.17756
#6	0.381179	0.018227
Mean	1	0.09784
Std. Error of Mean	0.391	0.03966
P value	control vs. sh-Piezo1
	0.0446

## Sheet: Fig4I
L cells qpcr
Medium GLP-1 concentration (fold change)	control	sh-Piezo1
#1	0.965101	0.651008
#2	1.03615	0.624834
#3	1.00997	0.594921
#4	0.987536	0.639791
#5	0.938926	0.662226
#6	1.06232	0.64353
Mean	1	0.6361
Std. Error of Mean	0.01861	0.009654
P value	control vs. sh-Piezo1
	<0.0001

## Sheet: Fig4J
	L cells		grey value (fold change)
control	Western blot	Piezo1/b-actin	CaMKK2/b-actin	pCaMK4/CaMK4	pmTOR/mTOR	ps6k/s6k	ps6/s6	GLP-1/b-actin
	#1	0.959962	0.85529	0.827653	0.890425	0.777724	1.11571	0.965019
	#2	0.943384	0.881448	1.03239	1.02145	0.912136	1.08158	0.964773
	#3	0.986397	0.979839	1.03835	1.04004	1.05826	0.996858	0.925403
	#4	1.09878	1.05617	0.937781	1.17102	1.08923	1.04221	1.24616
	#5	1.02816	1.18715	0.873591	1.10495	1.10083	0.957223	0.874037
	#6	0.983315	1.0401	1.29024	0.772117	1.06182	0.806418	1.02461
	Mean	1	1	1	1	1	1	1
	Std. Error of Mean	0.0229655	0.0500638	0.0674069	0.0595156	0.0524314	0.0451441	0.0532589
sh-Piezo1	#1	0.324418	0.397548	0.235997	0.293222	0.177549	0.383939	0.353254
	#2	0.321791	0.324543	0.315636	0.443431	0.255207	0.396288	0.280017
	#3	0.236058	0.367594	0.350136	0.200967	0.140096	0.241818	0.298033
	#4	0.29382	0.487432	0.46492	0.211558	0.154585	0.334685	0.240719
	#5	0.211588	0.498124	0.389886	0.119061	0.197874	0.514417	0.24822
	#6	0.187465	0.415822	0.102668	0.15363	0.148851	0.40071	0.220352
	Mean	0.262523	0.415177	0.309874	0.236978	0.179027	0.378643	0.273433
	Std. Error of Mean	0.0239803	0.027623	0.0517969	0.0478123	0.0174971	0.0364757	0.0196158
	Piezo1/b-actin
P value	control vs. sh-Piezo1
	<0.0001
	CaMKK2/b-actin
P value	control vs. sh-Piezo1
	<0.0001
	pCaMK4/CaMK4
P value	control vs. sh-Piezo1
	<0.0001
	pmTOR/mTOR
P value	control vs. sh-Piezo1
	<0.0001
	ps6k/s6k
P value	control vs. sh-Piezo1
	<0.0001
	ps6/s6
P value	control vs. sh-Piezo1
	<0.0001
	GLP-1/b-actin
P value	control vs. sh-Piezo1
	<0.0001

## Sheet: Fig4L
NCD mouse ileum qpcr	Piezo1loxp/loxp		Piezo1 IntL-CKO
proglucagon/β-actin mRNA levels	control	stretch	control	stretch
#1	0.985398	1.59077	0.46952	0.216028
#2	0.96822	1.12785	0.392842	0.197052
#3	0.89	1.60595	0.315636	0.170839
#4	1.03242	2.33954	0.332345	0.964598
#5	1.09052	2.80942	0.61535	0.172201
#6	1.03231	2.06801	0.54523	0.789615
Mean	1	1.924	0.4452	0.4184
Std. Error of Mean	0.02805	0.2465	0.04893	0.147
P value	Piezo1loxp/loxp control vs. Piezo1loxp/loxp stretch	Piezo1loxp/loxp control vs. Piezo1 IntL-CKO control	Piezo1 IntL--CKO control vs. Piezo1 IntL--CKO stretch
	0.0002	0.0336	0.9989

## Sheet: Fig4M
NCD mouse ileum qpcr	Piezo1loxp/loxp		Piezo1 IntL-CKO
Medium GLP-1 concentration (fold change)	control	stretch	control	stretch
#1	1.07414	1.48019	0.741999	0.890275
#2	0.97331	1.44461	0.69455	0.807241
#3	0.925862	1.51578	0.866551	0.682688
#4	1.11566	1.61068	0.777585	0.74793
#5	0.902138	1.40902	0.825034	0.86062
#6	1.0089	1.49799	0.931793	0.830965
Mean	1	1.493	0.8063	0.8033
Std. Error of Mean	0.03403	0.02825	0.0352	0.03122
P value	Piezo1 loxp/loxp control vs. Piezo1 loxp/loxp stretch	Piezo1 loxp/loxp control vs. Piezo1 IntL-CKO control	Piezo1 IntL-CKO control vs. Piezo1 IntL-CKO stretch
	<0.0001	0.0021	0.9999

[truncated: 1 more sheets: Fig4N]
