# Supplementary material for: Mechano-regulation of GLP-1 production by Piezo1 in intestinal L cells
Source: eLife journal article supplement (doi:10.7554/elife.97854), 2024-06-19
Supplement: fig5-data3 [file elife-97854-fig5-data3-v1.zip]

## Sheet: Fig5C
t/min	con			yoda1			Yoda1+GsMTx4
0	1	1	1	1	1	1	1	1	1
10	0.879856	1.0332	0.909892	1.71429	0.8	1	1.36538	0.99475	1.04286
20	0.872629	1.05231	0.848916	1.57143	0.8	1.11111	1.10714	1.0595	1.12505
30	0.953929	1.03622	0.924797	2.14286	1	0.722222	1.29121	0.986349	1.07733
40	1.00723	1.11569	0.827236	1.57143	0.6	0.944444	1.04945	0.985299	1.06761
50	1.09033	1.09658	0.882791	3.42857	1.31667	1.16667	0.997253	1.021	1.00442
60	0.957543	1.05533	0.785908	1.14286	0.4	0.666667	1.33791	1.03395	1.55988
70	0.939476	1.02213	0.900406	1.42857	5.88333	0.388889	1.08516	0.942247	1.08263
80	0.953929	1.04829	0.849594	1.57143	18.3833	0.5	1.24176	0.99825	1.11666
90	0.906956	1.05131	0.894309	2.14286	21	0.777778	1.18956	0.983549	1.00619
100	1.14363	1.04829	0.75542	1.28571	21	0.444444	1.14835	0.939447	1.0844
110.001	0.874435	0.998994	0.954607	3.28571	21.7667	2.11111	1.15934	0.928596	1.21564
120.001	1.02168	1.08551	0.930894	2.42857	17.1333	3.19444	1.15934	1.00945	1.19797
130.001	0.98374	1.02012	1.04404	4.88095	18.6333	4.72222	1.08242	0.951348	1.20106
140.001	0.885275	1.16197	0.936314	5.61905	19.8667	4.23148	1.29121	0.9916	1.16041
150.001	1.01084	0.943662	0.977642	7.83333	19.2667	3.75926	1.11813	0.916346	1.16173
160.001	1.03613	1.03622	0.944444	5.88095	18.4167	4.10185	1.14835	1.06265	1.2426
170.001	1.19783	1.17606	0.911247	6.7619	20.2833	3.36111	1.17308	1.0133	1.10429
180.001	1.01445	1.2002	0.890244	7.19048	21.0167	3.46296	1.42033	1.0161	1.08661
190.001	1.02981	1.15191	0.840108	6.78571	18.8667	3.06481	1.18681	1.02695	1.24348
200.001	1.13369	1.19014	0.847561	6	19.7333	3.65741	1.48626	0.957648	1.17985
210.001	1.02349	1.27163	0.924119	6.90476	21.4	4.25	1.53297	1.049	1.02917
220.001	1.0009	1.08954	0.849594	7.38095	19.7833	3.71296	1.21703	0.961848	1.18206
230.001	1.0262	1.22133	0.877371	5.78571	18.1	3.82407	1.32143	1.0203	1.13831
240.001	1.05691	1.22535	0.913279	6.7381	20.5	3.33333	1.31868	1.0756	1.33805
250.001	0.799458	1.30785	0.926829	9.5	16.8667	3.93519	1.27473	1.0763	1.27574
260.001	1.09666	1.07042	0.924119	5.71429	18.3833	3.78704	1.38462	1.0224	1.14627
270.001	1.18067	1.07948	0.9729	5.19048	17.1	2.92593	1.36813	1.0126	1.38489
280.001	1.04426	1.03219	0.894309	6.04762	20.2333	3.87963	1.11813	0.929646	1.28369
290.001	0.874435	1.09356	0.822493	5.57143	18.95	3.40741	1.34615	1.0378	1.1909
300.001	0.934959	1.03219	0.856369	7.19048	18.1167	4.18519	1.4478	1.01365	1.07645
310.001	1.04607	1.24648	0.897019	10.0238	21.7	3.49074	1.21154	1.04585	1.1308
320.001	1.04878	1.12475	0.954607	5.7381	19.7667	3.85185	1.56593	1.0567	1.1034
330.001	0.879856	1.19517	0.853658	5.28571	21.2167	3.87037	1.06593	0.985999	1.13699
340.001	1.0822	1.166	0.825881	9.14286	19.2	4.14815	1.35989	0.962898	1.18825
350.001	0.999097	1.10463	0.963415	8.80952	22.0333	3.25	1.12912	1.02275	1.14847
360.001	1.05149	1.10865	0.987805	9.2381	18.9333	3.62963	1.43407	1.03115	1.15864
370.001	0.859982	1.27163	0.924119	6.80952	19.9333	3.71296	1.36538	1.0455	1.03005
380.001	1.0533	1.20523	0.855691	7.45238	20.9667	4.24074	1.29121	1.05005	1.15555
390.001	1.08943	1.29376	0.817751	7.45238	18.1333	3.59259	1.20604	1.05215	1.18471
400.001	1.04336	1.07847	1.00135	7.14286	20.1667	3.06481	1.34066	0.980749	1.17057
410.001	1.05691	1.18008	0.929539	7.88095	17.6833	3.50926	1.18681	0.989849	1.27221
420.001	0.923216	1.0996	0.920054	8.59524	19.9833	4.32407	1.02473	1.12006	1.26867
430.001	1.05781	1.09054	0.95664	9.07143	21.3667	3.69444	1.61538	1.08015	1.30225
440.001	0.928636	1.18209	0.795393	9.54762	21.65	3.57407	1.13187	1.09766	1.18648
450.001	1.00903	1.03622	0.976287	9	18.3667	4.38889	1.30495	1.0658	1.13875
460.001	0.933153	1.20825	0.901761	7.35714	19.3	4.25	1.21978	1.0084	1.31021
470.001	1.11472	1.10765	0.961382	6.7381	18.75	4.32407	1.35714	1.0483	1.22802
480	1.01897	1.33803	0.977642	6.35714	20.0333	4.21296	1.07418	1.0147	1.23553

## Sheet: Fig5D
	STC-1 cells	grey value (fold change)
0	Western blot	CaMKK2/b-actin	pCaMK4/CaMK4	pmTOR/mTOR	ps6k/s6k	ps6/s6	GLP-1/b-actin
	#1	0.909857	1.01108	1.05996	0.977971	1.14926	1.14338
	#2	1.231	1.01302	1.09906	1.00045	1.15586	1.02208
	#3	0.859139	0.975897	0.840979	1.00363	0.694881	0.999072
	#4	1.44057	1.01838	1.00725	0.987235	1.35356	0.941264
	#5	0.643922	1.06283	1.08049	1.00999	0.870878	0.977398
	#6	0.915511	0.918792	0.912258	1.02073	0.775559	0.916798
	Mean	1	1	1	1	1	1
	Std. Error of Mean	0.1168	0.01979	0.042	0.006301	0.1052	0.03262
1.25	#1	0.947192	1.30305	1.67449	2.97877	2.32107	1.80147
	#2	1.00472	1.42389	1.73844	2.99849	2.68339	2.70408
	#3	1.00756	1.28207	1.68243	3.09491	2.15608	2.39033
	#4	1.38935	0.940817	1.49803	3.00807	3.71944	2.37999
	#5	1.46486	0.791307	1.46001	2.73882	3.54327	2.35284
	#6	1.18097	1.02817	1.39127	3.07094	3.35767	2.57025
	Mean	1.166	1.128	1.574	2.982	2.963	2.366
	Std. Error of Mean	0.08915	0.1	0.05804	0.05188	0.2712	0.1259
2.5	#1	1.89256	1.44516	2.73414	2.75153	3.3348	4.55395
	#2	2.2034	1.81886	2.54931	2.67903	3.30908	4.21677
	#3	2.26409	1.56692	3.40647	2.75666	3.35539	4.13115
	#4	1.7992	2.56267	2.18122	2.73076	3.6847	4.33757
	#5	2.45846	2.19309	2.36676	2.79623	6.35068	4.09473
	#6	2.57916	2.54545	2.38712	2.68882	4.90095	4.52847
	Mean	2.199	2.022	2.604	2.734	4.156	4.31
	Std. Error of Mean	0.1251	0.198	0.1776	0.01804	0.5042	0.08063
5	#1	3.15481	1.72842	3.88762	3.80881	3.82363	4.23821
	#2	2.54772	2.29395	4.63365	4.47155	3.76069	4.66017
	#3	3.12741	2.34471	4.62523	4.25266	3.37423	4.76315
	#4	2.62167	3.98697	3.25616	4.31389	7.55182	5.0602
	#5	2.6198	2.38474	2.86418	4.29847	5.9193	4.82245
	#6	2.90515	2.58976	3.37997	5.06897	5.94511	4.6733
	Mean	2.829	2.555	3.774	4.369	5.062	4.703
	Std. Error of Mean	0.1106	0.3096	0.3015	0.1669	0.678	0.1102
10	#1	2.93847	1.25985	3.84037	3.53988	5.01581	2.92201
	#2	3.11544	2.57139	4.70348	4.25237	4.20297	3.23395
	#3	3.55207	2.192	4.34225	4.7202	5.55773	3.34892
	#4	3.03792	1.98795	2.02043	4.5372	4.9943	3.46039
	#5	3.41983	2.15439	2.02552	4.77072	7.20481	3.21922
	#6	3.49691	0.810653	2.17531	4.53336	7.71507	3.1842
	Mean	3.26	1.829	3.185	4.392	5.782	3.228
	Std. Error of Mean	0.1065	0.2693	0.5097	0.186	0.5631	0.074
	CaMKK2/b-actin
P value	0 vs. 2.50	0 vs. 5.00	0 vs. 10.00
	<0.0001	<0.0001	<0.0001
	pCaMK4/CaMK4
P value	0 vs. 2.50	0 vs. 5.00	0 vs. 10.00
	0.0069	<0.0001	0.0321
	pmTOR/mTOR
P value	0 vs. 2.50	0 vs. 5.00	0 vs. 10.00
	0.0015	<0.0001	<0.0001
	ps6k/s6k
P value	0 vs. 2.50	0 vs. 5.00	0 vs. 10.00
	<0.0001	<0.0001	<0.0001
	ps6/s6
P value	0 vs. 2.50	0 vs. 5.00	0 vs. 10.00
	0.0003	<0.0001	<0.0001
	GLP-1/b-actin
P value	0 vs. 2.50	0 vs. 5.00	0 vs. 10.00
	<0.0001	<0.0001	<0.0001

## Sheet: Fig5E
STC-1 cells qpcr	Yoda1 (μmol/l）
Gcg/β-actin mRNA levels	0	0.125	2.5	5	10
#1	1.04113	1.20476	1.51239	1.77061	1.93197
#2	0.95	1.21904	0.944056	1.71659	1.57488
#3	1.05	1.25367	1.39563	1.75695	1.56284
#4	1.34529	1.26553	1.35925	1.82855	1.852
#5	0.964255	1.1625	1.25255	1.7225	1.9255
#6	0.690454	1.299	0.9254	1.752	1.4292
Mean	1	1.234	1.232	1.758	1.713
Std. Error of Mean	0.08616	0.01983	0.09982	0.01648	0.08843
P value	0 vs. 2.50	0 vs. 5.00	0 vs. 10.00
	0.1138	<0.0001	<0.0001

## Sheet: Fig5F
STC-1 cells	Yoda1 (μmol/l）
Medium GLP-1 concentration (fold change)	0	0.125	2.5	5	10
#1	1.3	1.65	1.85	2.6	1.32
#2	0.7	2.4	1.2	2.3	2.55
#3	1.003	0.3	1.55	2.95	2
#4	1.09777	1.69	1.97	2.65	1.65
#5	1.36592	1.54	1.23	2.79	2.34
#6	0.536313	1.39	1.61	2.91	2.67
Mean	1	1.495	1.568	2.7	2.088
Std. Error of Mean	0.134	0.2782	0.1282	0.09784	0.2164
P value	0 vs. 2.50	0 vs. 5.00	0 vs. 10.00
	0.1178	<0.0001	0.0011

## Sheet: Fig5G
	STC-1 cells	grey value (fold change)
DMSO	Western blot	CaMKK2/b-actin	pCaMK4/CaMK4	pmTOR/mTOR	ps6k/s6k	ps6/s6	GLP-1/b-actin
	#1	1.11018	1.11814	0.898167	0.961819	0.997531	0.71461
	#2	0.942269	0.817268	0.94845	0.823601	1.02113	1.12699
	#3	0.998912	1.14914	0.757737	1.08105	0.873329	1.10105
	#4	0.771101	1.15633	1.02014	0.700647	1.11583	1.03529
	#5	0.965223	1.1114	1.34737	0.673927	1.04585	1.13549
	#6	1.21232	0.647723	1.02813	1.75894	0.946327	0.886572
	Mean	1	1	0.999999	0.999999	0.999999	1
	Std. Error of Mean	0.0616862	0.0876619	0.0803294	0.164426	0.0341061	0.0683752
Yoda1	#1	3.90339	3.07674	2.32953	2.83643	3.49338	2.68453
	#2	4.45967	3.95549	2.38428	2.43613	3.46757	2.92479
	#3	3.89597	4.86177	2.36552	2.63252	3.62603	2.61048
	#4	4.52115	4.83185	3.59218	2.65103	3.28058	2.38083
	#5	5.42279	5.54027	3.46082	2.23293	3.89598	2.50309
	#6	4.49665	4.10215	3.77125	2.50585	3.90261	2.59045
	Mean	4.44994	4.39471	2.98393	2.54915	3.61102	2.6157
	Std. Error of Mean	0.22799	0.352944	0.282106	0.0845582	0.101662	0.0750074
Yoda1+GsMtx4	#1	1.10659	0.882878	1.0509	2.28002	1.89599	1.47501
	#2	1.30106	1.29916	1.0759	0.443904	1.04115	1.41897
	#3	1.22815	0.758956	1.34708	0.991412	1.81487	1.47455
	#4	0.78974	0.715147	0.700301	0.393576	0.827673	1.04541
	#5	0.82466	0.608241	1.23073	1.38064	1.63826	1.63812
	#6	1.23489	0.504635	1.21871	1.30742	1.18066	1.47814
	Mean	1.08085	0.794836	1.10394	1.13283	1.39977	1.4217
	Std. Error of Mean	0.0903619	0.113837	0.0921754	0.285719	0.180678	0.0810884
	CaMKK2/b-actin
P value	DMSO vs. Yoda1	Yoda1+GsMtx4 vs. Yoda1
	<0.0001	<0.0001
	pCaMK4/CaMK4
P value	DMSO vs. Yoda1	Yoda1+GsMtx4 vs. Yoda1
	<0.0001	<0.0001
	pmTOR/mTOR
P value	DMSO vs. Yoda1	Yoda1+GsMtx4 vs. Yoda1
	<0.0001	<0.0001
	ps6k/s6k
P value	DMSO vs. Yoda1	Yoda1+GsMtx4 vs. Yoda1
	0.0001	0.0003
	ps6/s6
P value	DMSO vs. Yoda1	Yoda1+GsMtx4 vs. Yoda1
	<0.0001	<0.0001
	GLP-1/b-actin
P value	DMSO vs. Yoda1	Yoda1+GsMtx4 vs. Yoda1
	<0.0001	<0.0001

## Sheet: Fig5H
STC-1 cells qpcr
Gcg/β-actin mRNA levels	DMSO	Yoda1	Yoda1+GsMtx4
#1	0.828843	2.00535	0.734042
#2	1.17114	2.34129	0.773914
#3	0.966356	1.57242	0.973488
#4	1.03484	1.72706	0.761593
#5	1.04453	2.76625	0.497155
#6	0.955446	1.88372	0.29331
Mean	1	2.049	0.6723
Std. Error of Mean	0.04651	0.1789	0.09783
P value	DMSO vs. Yoda1	Yoda1+GsMtx4 vs. Yoda1
	<0.0001	<0.0001

## Sheet: Fig5I
STC-1 cells qpcr
Medium GLP-1 concentration (fold change)	DMSO	Yoda1	Yoda1+GsMtx4
#1	1.1223	1.93583	1.21241
#2	0.595913	2.19902	1.26097
#3	1.28979	2.41437	0.997949
#4	1.40524	1.87183	1.15245
#5	0.26087	1.96522	1.18823
#6	1.31304	2.1751	0.338376
Mean	0.9979	2.094	1.025
Std. Error of Mean	0.1889	0.08391	0.1421
P value	DMSO vs. Yoda1	Yoda1+GsMtx4 vs. Yoda1
	0.0002	0.0002

## Sheet: Fig5K
STC-1 cells	Stretch
Medium GLP-1 concentration (fold change)	0 min	30 min	24 h
#1	1.38526	3.41622	4.76348
#2	0.92492	3.03973	4.23853
#3	1.92231	3.97397	5.5412
#4	0.311139	1.73051	2.41298
#5	0.915062	2.19084	3.05486
#6	0.541307	1.30853	1.82459
Mean	1	2.61	3.23
Std. Error of Mean	0.2378	0.4218	0.3933
P value	0 min vs. 30 min	0 min vs. 24h
	0.012	0.0011

## Sheet: Fig5L
STC-1 cells qpcr
Piezo1/β-actin mRNA levels	Control	Stretch
#1	1.5	4.21
#2	0.5	4.35
#3	0.75	4.17
#4	1.26	4.8277
#5	0.845535	2.1615
#6	1.15447	1.35628
Mean	1.002	3.513
Std. Error of Mean	0.1503	0.5723
P value	Control vs. Stretch
	0.0017

## Sheet: Fig5M
STC-1 cells qpcr
proglucagon/β-actin mRNA levels	Control	Stretch
#1	1.11	1.96
#2	1.2	2.03
#3	0.78	1.46
#4	0.91	1.9
#5	1.16	1.7
#6	0.84	1.48
Mean	1	1.755
Std. Error of Mean	0.07298	0.1007
P value	Control vs. Stretch
	0.0001

[truncated: 1 more sheets: Fig5N]
