# Supplementary material for: Mechano-regulation of GLP-1 production by Piezo1 in intestinal L cells
Source: eLife journal article supplement (doi:10.7554/elife.97854), 2024-06-19
Supplement: fig6-data1 [file elife-97854-fig6-data1-v1.zip]

Figure 6D

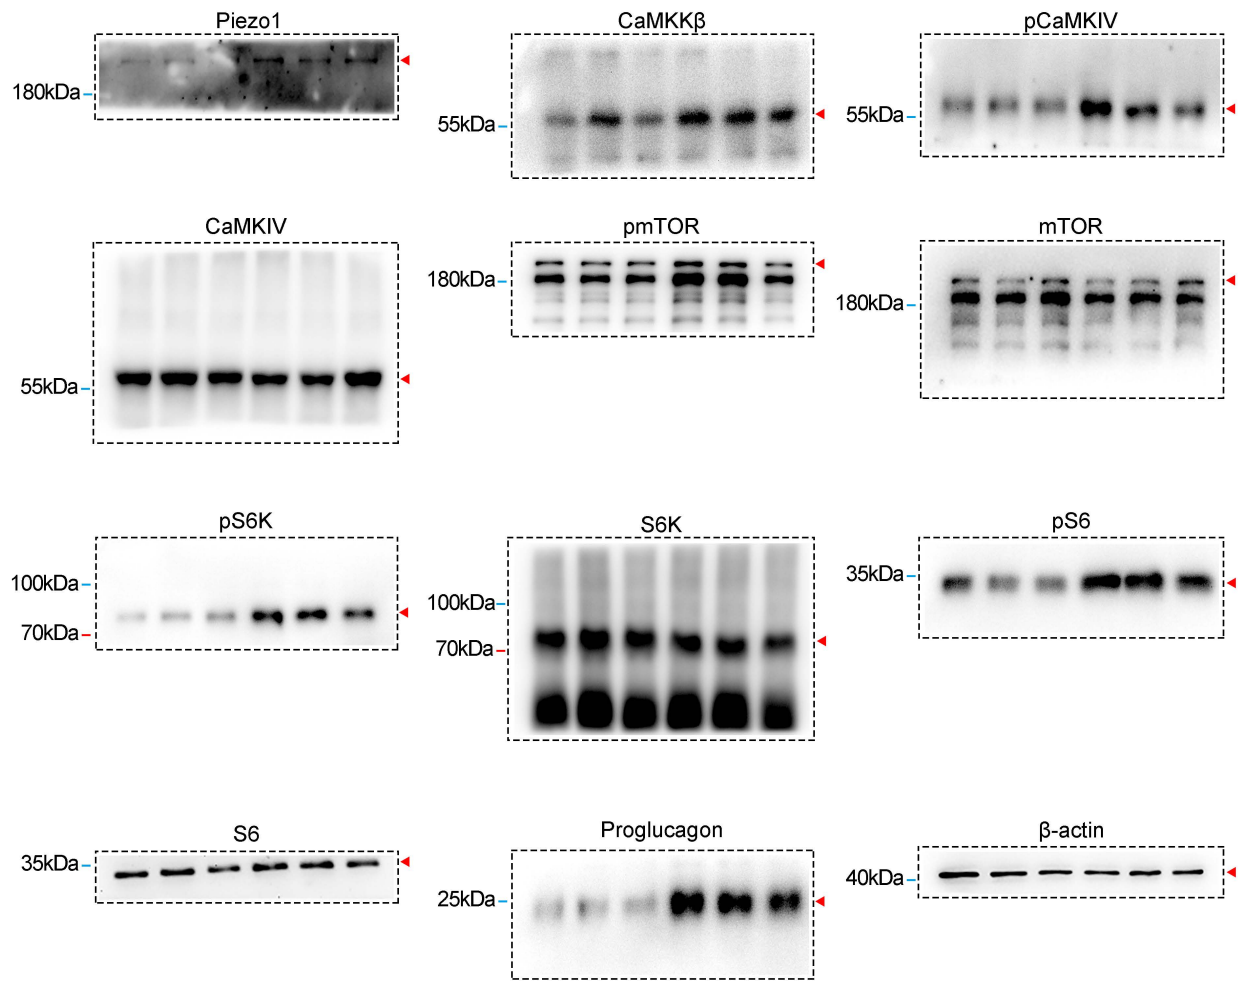

**Figure 6, Source Data 1.**Original membranes corresponding to Figure 6, panel D, show the treatment of STC-1 cells. The first three lanes represent cells treated with GFP, while lanes 4, 5, and 6 correspond to cells treated with *Piezo1*-GFP.

Figure 6H

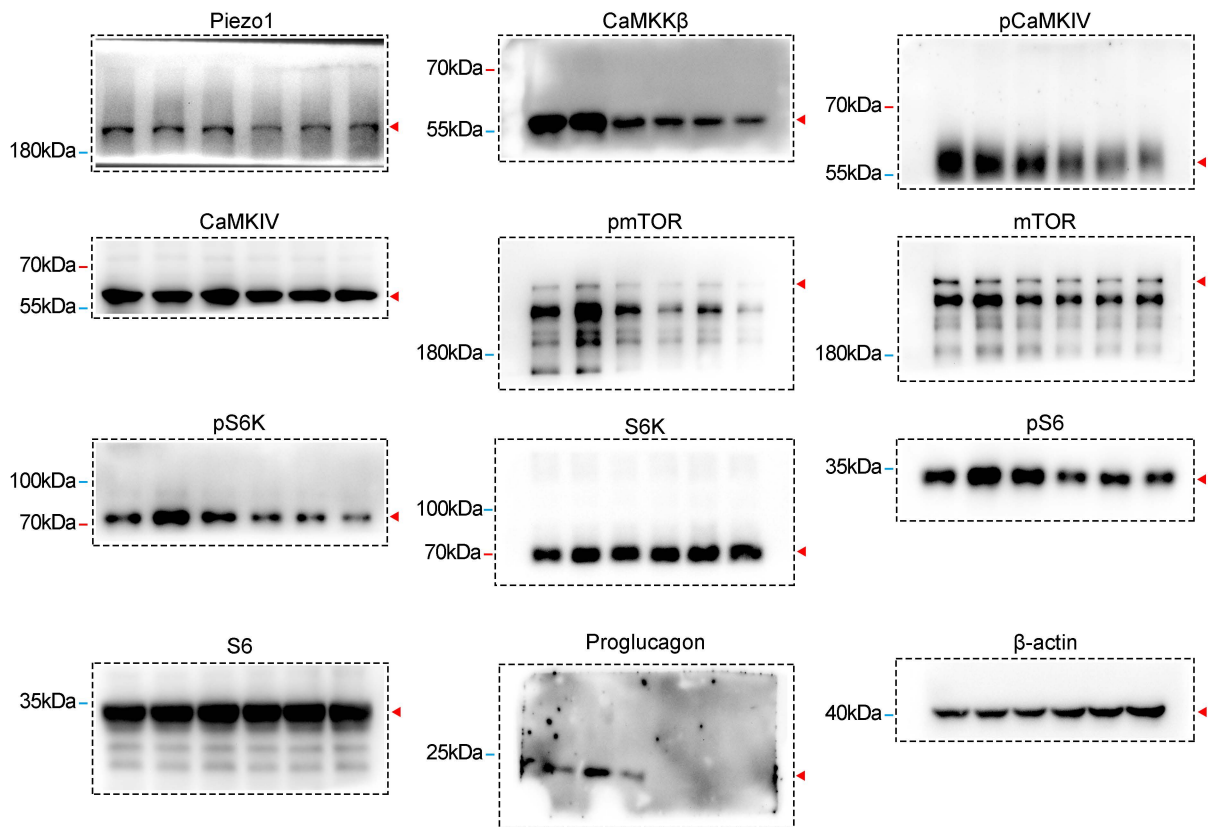

**Figure 6, Source Data 1.** Original membranes corresponding to Figure 6, panel H, depicting the treatment of STC-1 cells. The first three lanes represent control treatments, while lanes 4, 5, and 6 correspond to sh-*Piezo1* treatments.
