# Supplementary material for: Mechano-regulation of GLP-1 production by Piezo1 in intestinal L cells
Source: eLife journal article supplement (doi:10.7554/elife.97854), 2024-06-19
Supplement: fig6-data3 [file elife-97854-fig6-data3-v1.zip]

## Sheet: Fig6A
STC-1 cells qpcr
Piezo1/β-actin mRNA levels	GFP	Piezo1-GFP
#1	0.20636	2.91983
#2	0.158975	2.96622
#3	3.03316	4.67507
#4	2.3782	5.02703
#5	0.0878194	9.80755
#6	0.135556	11.8467
Mean	1	6.207
Std. Error of Mean	0.5462	1.526
P value	GFP vs. Piezo1-GFP
	0.0093

## Sheet: Fig6B
STC-1 cells qpcr
Gcg/β-actin mRNA levels	GFP	Piezo1-GFP
#1	1.40096	3.27588
#2	1.46554	2.61882
#3	0.75468	3.01398
#4	0.627772	3.3484
#5	0.774543	6.93747
#6	0.976481	6.1336
Mean	1	4.221
Std. Error of Mean	0.1446	0.7465
P value	GFP vs. Piezo1-GFP
	0.0017

## Sheet: Fig6C
STC-1 cells qpcr
Medium GLP-1 concentration (fold change)	GFP	Piezo1-GFP
#1	1.03484	1.69024
#2	1.02439	1.74251
#3	0.940767	1.67979
#4	1.17	2.95
#5	1.12	3.21
#6	0.7	2.89
Mean	1	2.36
Std. Error of Mean	0.06797	0.2969
P value	GFP vs. Piezo1-GFP
	0.0012

## Sheet: Fig6D
	STC-1 cells	grey value (fold change)
GFP	Western blot	Piezo1/b-actin	CaMKK2/b-actin	pCaMK4/CaMK4	pmTOR/mTOR	ps6k/s6k	ps6/s6	GLP-1/b-actin
	#1	1.12791	0.823507	0.929153	1.34252	0.621903	0.97567	0.729799
	#2	1.25299	1.26131	0.901672	1.14104	0.514283	0.6842	1.11795
	#3	0.900223	1.05584	1.30349	1.07831	0.953606	0.892641	1.36326
	#4	0.775044	0.75023	0.916375	0.860238	0.971872	1.31324	0.62285
	#5	0.798094	0.997323	0.953928	0.778487	1.49535	1.04194	1.01163
	#6	1.14573	1.11179	0.995377	0.799413	1.44298	1.09231	1.15451
	Mean	1	1	1	1	1	1	1
	Std. Error of Mean	0.082246	0.0769069	0.0621647	0.0916839	0.165673	0.0856827	0.113303
Piezo1-GFP	#1	4.39609	3.08833	3.14362	3.88968	5.65387	2.92752	9.83257
	#2	3.66428	2.69574	3.26849	2.91002	5.10337	2.77711	7.9573
	#3	3.93575	2.85795	3.62926	4.09065	5.60318	4.14361	7.78245
	#4	4.24464	3.01914	4.33345	2.36524	6.53519	3.73606	9.42977
	#5	3.01305	2.78327	3.12287	2.53495	5.8538	3.35596	8.09782
	#6	3.57007	3.1165	3.52171	2.88256	7.25023	4.27059	8.07518
	Mean	3.80398	2.92682	3.50323	3.11218	5.99994	3.53514	8.52918
	Std. Error of Mean	0.205097	0.0705541	0.185705	0.291354	0.313694	0.253469	0.35528
	Piezo1/b-actin
P value	GFP vs. Piezo1-GFP
	<0.0001
	CaMKK2/b-actin
P value	GFP vs. Piezo1-GFP
	<0.0001
	pCaMK4/CaMK4
P value	GFP vs. Piezo1-GFP
	<0.0001
	pmTOR/mTOR
P value	GFP vs. Piezo1-GFP
	<0.0001
	ps6k/s6k
P value	GFP vs. Piezo1-GFP
	<0.0001
	ps6/s6
P value	GFP vs. Piezo1-GFP
	<0.0001
	GLP-1/b-actin
P value	GFP vs. Piezo1-GFP
	<0.0001

## Sheet: Fig6E
STC-1 cells qpcr
Piezo1/β-actin mRNA levels	Control	sh-Piezo1
#1	1.0852	0.439462
#2	1.04933	0.44843
#3	1.14798	0.313901
#4	0.869955	0.367713
#5	1.04036	0.0627803
#6	0.807175	0.286996
Mean	1	0.3199
Std. Error of Mean	0.05395	0.05783
P value	Control vs. sh-Piezo1
	<0.0001

## Sheet: Fig6F
STC-1 cells qpcr
Gcg/β-actin mRNA levels	Control	sh-Piezo1
#1	0.84507	0.58216
#2	0.929577	0.488263
#3	1.11737	0.666667
#4	1.02347	0.460094
#5	1.01408	0.610329
#6	1.07042	0.600939
Mean	1	0.5681
Std. Error of Mean	0.04019	0.03205
P value	Control vs. sh-Piezo1
	<0.0001

## Sheet: Fig6G
STC-1 cells
Medium GLP-1 concentration (fold change)	Control	sh-Piezo1
#1	0.97	0.76
#2	1.06	0.74
#3	1.13	0.87
#4	1.11	0.72
#5	1.04	0.78
#6	0.92	0.86
Mean	1	0.7883
Std. Error of Mean	0.03301	0.02561
P value	Control vs. sh-Piezo1
	0.0001

## Sheet: Fig6H
	STC-1 cells	grey value (fold change)
Control	Western blot	Piezo1/b-actin	CaMKK2/b-actin	pCaMK4/CaMK4	pmTOR/mTOR	ps6k/s6k	ps6/s6	GLP-1/b-actin
	#1	1.0078	0.9568	0.969119	0.880549	1.22931	0.840672	1.08447
	#2	1.02473	1.07824	1.03798	1.17667	0.770244	1.06602	1.08189
	#3	0.943329	0.881787	0.925359	0.752018	0.892893	0.97571	0.69194
	#4	1.04429	1.09089	0.992501	1.15281	1.19604	1.10189	1.0678
	#5	1.0104	1.06455	1.08779	0.945533	0.851156	0.890161	1.07541
	#6	0.96946	0.927737	0.987251	1.09242	1.06036	1.12554	0.99849
	Mean	1	1	1	1	1	1	1
	Std. Error of Mean	0.0151504	0.036337	0.0230167	0.068759	0.0776901	0.0477988	0.0629889
sh-Piezo1	#1	0.252986	0.216447	0.313953	0.269875	0.306423	0.349997	0.129653
	#2	0.262403	0.230358	0.303272	0.423375	0.312369	0.354307	0.166321
	#3	0.203158	0.174969	0.293773	0.153773	0.289708	0.361491	0.098311
	#4	0.2949	0.253106	0.317765	0.275964	0.226357	0.361326	0.162313
	#5	0.240122	0.20363	0.292037	0.19602	0.309089	0.371286	0.13722
	#6	0.202503	0.182701	0.27028	0.189255	0.2428	0.346833	0.135061
	Mean	0.242679	0.210202	0.298513	0.251377	0.281124	0.35754	0.138147
	Std. Error of Mean	0.0146115	0.0120095	0.007055	0.0395728	0.0152098	0.00365552	0.0100784
	Piezo1/b-actin
P value	Control vs. sh-Piezo1
	<0.0001
	CaMKK2/b-actin
P value	Control vs. sh-Piezo1
	<0.0001
	pCaMK4/CaMK4
P value	Control vs. sh-Piezo1
	<0.0001
	pmTOR/mTOR
P value	Control vs. sh-Piezo1
	<0.0001
	ps6k/s6k
P value	Control vs. sh-Piezo1
	<0.0001
	ps6/s6
P value	Control vs. sh-Piezo1
	<0.0001
	GLP-1/b-actin
P value	Control vs. sh-Piezo1
	<0.0001
