# Supplementary material for: Mechano-regulation of GLP-1 production by Piezo1 in intestinal L cells
Source: eLife journal article supplement (doi:10.7554/elife.97854), 2024-06-19
Supplement: fig7-data3 [file elife-97854-fig7-data3-v1.zip]

## Sheet: Fig7A
STC-1 cells qpcr
Gcg/β-actin mRNA levels	Control	CaMKK2	CaMK4
#1	1.03	2.5	2.85
#2	1.07	2.73	2.82
#3	1.52	2.91	3.09
#4	0.68	5.22	7.54
#5	0.88	3.36	7.01
#6	0.83	3.95	9.03
Mean	1.002	3.445	5.39
Std. Error of Mean	0.1186	0.4124	1.138
P value	Control vs. CaMKK2	Control vs. CaMK4
	0.048	0.001

## Sheet: Fig7B
STC-1 cells qpcr
Medium GLP-1 concentration (fold change)	Control	CaMKK2	CaMK4
#1	0.913577	1.75626	1.81076
#2	0.70505	2.01061	1.88343
#3	0.903309	1.80339	1.66542
#4	0.876584	2.23016	2.12584
#5	1.29276	1.95513	1.81991
#6	1.30872	1.9016	2.40087
Mean	1	1.943	1.951
Std. Error of Mean	0.1	0.0691	0.1089
P value	Control vs. CaMKK2	Control vs. CaMK4
	<0.0001	<0.0001

## Sheet: Fig7C
	STC-1 cells	grey value (fold change)
Control	Western blot	CaMKK2/b-actin	CaMK4/b-actin	pCaMK4/b-actin	pmTOR/mTOR	ps6k/s6k	ps6/s6	GLP-1/b-actin
	#1	1.10339	0.833425	0.933743	1.01781	0.869285	1.07548	1.02335
	#2	0.824184	0.900202	1.02241	1.02268	0.961051	1.08139	1.09961
	#3	0.824458	1.03948	1.00329	1.00986	1.11437	1.16256	1.0704
	#4	1.04764	1.03116	0.999721	1.00407	0.95793	1.23571	0.833263
	#5	0.909886	1.10866	1.02906	0.98316	0.973344	0.923679	1.27233
	#6	1.29044	1.08706	1.01178	0.962425	1.12402	0.521186	0.701046
	Mean	1	1	1	1	1	1	1
	Std. Error of Mean	0.0746461	0.0445811	0.0140072	0.00938214	0.0406388	0.104784	0.0830184
CaMKK2	#1	3.20362	3.83127	9.92398	3.5657	4.86384	2.37591	12.3041
	#2	3.33463	4.11972	10.9497	3.56094	5.17869	2.4088	13.5114
	#3	3.32516	4.05894	10.2746	3.72007	4.89498	2.33962	12.7644
	#4	3.33566	3.72072	9.65567	3.45262	5.76495	2.2929	12.0158
	#5	3.44381	4.27104	10.7065	3.48863	4.81239	2.32302	13.4236
	#6	3.20375	4.20145	10.5455	3.55288	5.13097	2.36469	13.044
	Mean	3.30777	4.03386	10.3426	3.55681	5.10764	2.35082	12.8439
	Std. Error of Mean	0.0374058	0.0878338	0.19949	0.0375361	0.144854	0.0167702	0.245296
CaMK4	#1	3.43397	11.1739	10.2704	3.60966	5.07667	2.76209	12.8535
	#2	3.23992	10.8853	9.69991	3.71608	5.94616	2.8182	12.1037
	#3	3.24948	11.8111	10.3391	3.22158	5.07807	2.71755	12.9697
	#4	3.36857	10.4102	9.66568	3.2414	5.40599	2.8009	12.1286
	#5	3.29881	10.2089	10.0649	3.2333	5.15081	2.7217	12.5259
	#6	3.15599	10.1521	10.4609	3.35871	5.92646	2.7357	13.0921
	Mean	3.29112	10.7736	10.0835	3.39679	5.43069	2.75935	12.6122
	Std. Error of Mean	0.0404481	0.263718	0.137208	0.0876132	0.167342	0.0172448	0.174764
	CaMKK2/b-actin
P value	Control vs. CaMKK2	Control vs. CaMK4
	<0.0001	<0.0001
	CaMK4/b-actin
P value	Control vs. CaMKK2	Control vs. CaMK4
	<0.0001	<0.0001
	pCaMK4/b-actin
P value	Control vs. CaMKK2	Control vs. CaMK4
	<0.0001	<0.0001
	pmTOR/mTOR
P value	Control vs. CaMKK2	Control vs. CaMK4
	<0.0001	<0.0001
	ps6k/s6k
P value	Control vs. CaMKK2	Control vs. CaMK4
	<0.0001	<0.0001
	ps6/s6
P value	Control vs. CaMKK2	Control vs. CaMK4
	<0.0001	<0.0001
	GLP-1/b-actin
P value	Control vs. CaMKK2	Control vs. CaMK4
	<0.0001	<0.0001

## Sheet: Fig7D
STC-1 cells qpcr
Gcg/β-actin mRNA levels	Control	STO-609
#1	1.10147	0.80577
#2	0.808069	0.78899
#3	0.890804	0.816591
#4	1.05142	0.726395
#5	1.14766	0.636731
#6	1.00057	0.880604
Mean	1	0.7758
Std. Error of Mean	0.05276	0.0344
P value	Control vs. STO-609
	0.0052

## Sheet: Fig7E
STC-1 cells
Medium GLP-1 concentration (fold change)	Control	STO-609
#1	0.84106	0.486072
#2	1.0363	0.489927
#3	0.971222	0.673337
#4	1.17238	0.649672
#5	0.935723	0.668817
#6	1.04516	0.576344
Mean	1	0.5907
Std. Error of Mean	0.04593	0.03546
P value	Control vs. STO-609
	<0.0001

## Sheet: Fig7F
	STC-1 cells	grey value (fold change)
Control	Western blot	CaMKK2/b-actin	pCaMK4/CaMK4	pmTOR/mTOR	ps6k/s6k	ps6/s6	GLP-1/b-actin
	#1	0.781479	0.938332	0.943963	0.298981	1.09086	0.909776
	#2	1.30465	0.934753	0.955838	0.21941	0.976992	1.01819
	#3	0.95518	1.02356	1.00554	0.181272	0.836473	1.07072
	#4	0.702892	1.04845	0.892615	0.273908	1.08544	0.959658
	#5	1.35342	0.99439	1.12668	0.25939	0.91129	1.06813
	#6	0.902383	1.06051	1.07536	0.235087	1.09895	0.973519
	Mean	1	1	1	1	1	1
	Std. Error of Mean	0.110344	0.0221029	0.0357677	0.0403702	0.044902	0.0261045
STO-609	#1	0.264276	0.23566	0.216615	0.0319207	0.281169	0.244518
	#2	0.201201	0.218965	0.147296	0.00760189	0.273409	0.243889
	#3	0.350231	0.210253	0.180694	0.0124691	0.216914	0.213929
	#4	0.3511	0.246301	0.216983	0.022629	0.288327	0.245115
	#5	0.229765	0.209708	0.15039	0.0115741	0.263406	0.227209
	#6	0.397311	0.195571	0.175652	0.00509021	0.233117	0.235863
	Mean	0.298981	0.21941	0.181272	0.273908	0.25939	0.235087
	Std. Error of Mean	0.0319207	0.00760189	0.0124691	0.022629	0.0115741	0.00509021
	CaMKK2/b-actin
P value	Control vs. STO-609
	0.0001
	pCaMK4/CaMK4
P value	Control vs. STO-609
	<0.0001
	pmTOR/mTOR
P value	Control vs. STO-609
	<0.0001
	ps6k/s6k
P value	Control vs. STO-609
	<0.0001
	ps6/s6
P value	Control vs. STO-609
	<0.0001
	GLP-1/b-actin
P value	Control vs. STO-609
	<0.0001

## Sheet: Fig7G
STC-1 cells qpcr
Gcg/β-actin mRNA levels	Control	Yoda1	Yoda1+Rapamycin
#1	0.97368	4.17167	0.146233
#2	0.947357	3.42459	0.173516
#3	1.31441	2.26926	1.05996
#4	1.11531	2.24831	1.07488
#5	0.739094	4.7221	0.138325
#6	0.910157	3.78166	0.147645
Mean	1	3.436	0.4568
Std. Error of Mean	0.07995	0.4118	0.1932
P value	Control vs. Yoda1	Yoda1 vs. Yoda1+Rapamycin
	<0.0001	<0.0001

## Sheet: Fig7H
STC-1 cells
Medium GLP-1 concentration (fold change)	Control	Yoda1	Yoda1+Rapamycin
#1	0.915321	1.69377	1.20617
#2	1.23183	2.10438	1.28316
#3	0.684352	2.03931	0.889658
#4	1.09496	2.71557	1.54338
#5	0.823195	2.46761	1.04746
#6	1.25033	1.94185	0.795559
Mean	1	2.16	1.128
Std. Error of Mean	0.09372	0.1512	0.112
P value	Control vs. Yoda1	Yoda1 vs. Yoda1+Rapamycin
	<0.0001	<0.0001

## Sheet: Fig7I
	STC-1 cells	grey value (fold change)
Control	Western blot	pmTOR/mTOR	ps6k/s6k	ps6/s6	GLP-1/b-actin
	#1	0.881909	1.04467	1.10411	1.25055
	#2	0.813305	0.989247	0.962311	0.709619
	#3	1.11945	1.02574	1.06393	1.00582
	#4	0.984506	1.00273	1.1217	1.03889
	#5	1.07948	0.984189	0.820187	0.997461
	#6	1.12135	0.953421	0.92776	0.997667
	Mean	1	1	1	1
	Std. Error of Mean	0.0530259	0.0131662	0.0478574	0.0703928
Yoda1	#1	3.59947	2.93229	3.55593	2.869
	#2	4.18733	3.08166	2.78737	2.5393
	#3	4.26699	3.11991	3.14744	2.54466
	#4	4.10584	3.16144	2.77487	2.54364
	#5	5.00385	3.18533	3.29504	2.55316
	#6	3.21694	3.17773	3.88458	2.55064
	Mean	4.0634	3.10972	3.24087	2.60007
	Std. Error of Mean	0.249987	0.0388971	0.177775	0.0538248
Yoda1+Rapamycin	#1	0.137015	0.034215	0.005803	0.045524
	#2	0.030433	0.015089	0.018529	0.069366
	#3	0.082524	0.020478	0.021363	0.068126
	#4	0.100025	0.020473	0.033666	0.05782
	#5	0.083836	0.014934	0.014261	0.024731
	#6	0.075357	0.009137	0.019922	0.022798
	Mean	0.084865	0.0190543	0.018924	0.0480608
	Std. Error of Mean	0.014153	0.00348779	0.00373422	0.00844727
	pmTOR/mTOR
P value	Control vs. Yoda1	Yoda1 vs. Yoda1+Rapamycin
	<0.0001	<0.0001
	ps6k/s6k
P value	Control vs. Yoda1	Yoda1 vs. Yoda1+Rapamycin
	<0.0001	<0.0001
	ps6/s6
P value	Control vs. Yoda1	Yoda1 vs. Yoda1+Rapamycin
	<0.0001	<0.0001
	GLP-1/b-actin
P value	Control vs. Yoda1	Yoda1 vs. Yoda1+Rapamycin
	<0.0001	<0.0001
